# Supplementary material for: Consequences of early life exposure to the 1983–1985 Ethiopian Great Famine on cognitive function in adults: a historical cohort study
Source: PubMed Central journal article supplement — BMJ Open. 2020 Sep 24;10(9):e038977. doi: 10.1136/bmjopen-2020-038977 (PMC7517579; doi:10.1136/bmjopen-2020-038977), 2020-09-24
Supplement: bmjopen-2020-038977.draft_revisions.pdf [file bmjopen-2020-038977.draft_revisions.pdf]

# BMJ Open

BMJ Open is committed to open peer review. As part of this commitment we make the peer review history of every article we publish publicly available.

When an article is published we post the peer reviewers' comments and the authors' responses online. We also post the versions of the paper that were used during peer review. These are the versions that the peer review comments apply to.

The versions of the paper that follow are the versions that were submitted during the peer review process. They are not the versions of record or the final published versions. They should not be cited or distributed as the published version of this manuscript.

BMJ Open is an open access journal and the full, final, typeset and author-corrected version of record of the manuscript is available on our site with no access controls, subscription charges or pay-per-view fees (<http://bmjopen.bmj.com>).

If you have any questions on BMJ Open's open peer review process please email [info.bmjopen@bmj.com](mailto:info.bmjopen@bmj.com)

# BMJ Open

## Effects of early life exposure to Famine on adulthood cognitive function in Ethiopia: A historical cohort study in Northeast Ethiopia

|                               |                                                                                                                                                                                                                                                                                                                                                                                                                                                                                                                                                                                           |
|-------------------------------|-------------------------------------------------------------------------------------------------------------------------------------------------------------------------------------------------------------------------------------------------------------------------------------------------------------------------------------------------------------------------------------------------------------------------------------------------------------------------------------------------------------------------------------------------------------------------------------------|
| Journal:                      | <i>BMJ Open</i>                                                                                                                                                                                                                                                                                                                                                                                                                                                                                                                                                                           |
| Manuscript ID                 | bmjopen-2020-038977                                                                                                                                                                                                                                                                                                                                                                                                                                                                                                                                                                       |
| Article Type:                 | Original research                                                                                                                                                                                                                                                                                                                                                                                                                                                                                                                                                                         |
| Date Submitted by the Author: | 02-Apr-2020                                                                                                                                                                                                                                                                                                                                                                                                                                                                                                                                                                               |
| Complete List of Authors:     | Arage, Getachew;<br>Belachew, Tefera; Jimma University College of Public Health and Medical Sciences, Nutrition and Dietetics<br>Abera, Mubarek; Jimma University College of Public Health and Medical Sciences, Psychiatry<br>Abdulhay , Fedilu ; Jimma University College of Public Health and Medical Sciences, Obstetrics and Gynecology<br>Abdulahi, Misra; Jimma University College of Public Health and Medical Sciences, Department of Population and Family Health<br>Hassen , Kalkidan; Jimma University College of Public Health and Medical Sciences, Nutrition and Dietetics |
| Keywords:                     | Nutritional support < GASTROENTEROLOGY, Adult neurology < NEUROLOGY, NUTRITION & DIETETICS                                                                                                                                                                                                                                                                                                                                                                                                                                                                                                |
|                               |                                                                                                                                                                                                                                                                                                                                                                                                                                                                                                                                                                                           |

SCHOLARONE™  
Manuscripts

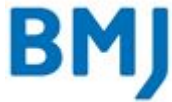

I, the Submitting Author has the right to grant and does grant on behalf of all authors of the Work (as defined in the below author licence), an exclusive licence and/or a non-exclusive licence for contributions from authors who are: i) UK Crown employees; ii) where BMJ has agreed a CC-BY licence shall apply, and/or iii) in accordance with the terms applicable for US Federal Government officers or employees acting as part of their official duties; on a worldwide, perpetual, irrevocable, royalty-free basis to BMJ Publishing Group Ltd ("BMJ") its licensees and where the relevant Journal is co-owned by BMJ to the co-owners of the Journal, to publish the Work in this journal and any other BMJ products and to exploit all rights, as set out in our [licence](#).

The Submitting Author accepts and understands that any supply made under these terms is made by BMJ to the Submitting Author unless you are acting as an employee on behalf of your employer or a postgraduate student of an affiliated institution which is paying any applicable article publishing charge ("APC") for Open Access articles. Where the Submitting Author wishes to make the Work available on an Open Access basis (and intends to pay the relevant APC), the terms of reuse of such Open Access shall be governed by a Creative Commons licence – details of these licences and which [Creative Commons](#) licence will apply to this Work are set out in our licence referred to above.

Other than as permitted in any relevant BMJ Author's Self Archiving Policies, I confirm this Work has not been accepted for publication elsewhere, is not being considered for publication elsewhere and does not duplicate material already published. I confirm all authors consent to publication of this Work and authorise the granting of this licence.

1  
2  
3  
4 **Effects of early life exposure to Famine on adulthood cognitive function**  
5 **in Ethiopia: A historical cohort study in Northeast Ethiopia**  
6  
7

8  
9  
10 Getachew Arage (MSc)<sup>1,2\*</sup>, Tefera Belachew (MD, MSc, PhD)<sup>2</sup>, Mubarek Abera (MSc,  
11 PhD)<sup>3</sup>, Fedilu Abdulhay (MD)<sup>4</sup>, Misra Abdulahi (MPH/RH)<sup>5</sup>, Kalkidan Hassen Abate  
12 (MSc, PhD)<sup>1</sup>  
13  
14

15  
16  
17  
18 <sup>1\*</sup>Correspondence: Getachew Arage  
19

20 Email: getachewarage2004@gmail.com  
21  
22  
23  
24  
25  
26  
27  
28  
29  
30  
31  
32  
33  
34  
35  
36  
37  
38  
39  
40  
41  
42  
43  
44  
45  
46  
47  
48  
49  
50  
51  
52  
53  
54  
55  
56  
57  
58  
59  
60

## Abstract

**Objective:** Earlier famine studies, as natural experiments, had tested the association between famine exposure during early life and adulthood cognitive function and reported variable findings. Hence, we sought to identify, (1) whether exposed to Ethiopian Great Famine during prenatal life had effect on cognitive function in adults, (2) whether this effect was associated with postnatal exposure to famine.

**Setting:** Raya Kobo district, North Wollo zone, northeast Ethiopia.

**Participants:** Adult men and women (n=1047) recruited to a historical cohort study with multistage stratified random sampling technique. Participants were divided into prenatal exposed, postnatal exposed (1-2 years during the famine) and non- exposed groups. Self-reported birth date and age of the participants was used to classify status of famine exposure.

**Outcome measures:** The primary outcome measures of this study was cognitive function in adults after early life exposure to famine. The Secondary outcome measures included whether this effect was specific to gestational or postnatal exposure windows. Montreal Cognitive Assessment (MoCA) tool was used to assess participants cognitive function.

**Results:** Adults having early life famine exposure were 3.2 points decreased cognitive test score ( $\beta = -3.2$ , 95% CI: -4.1, -2.3). Famine exposure at postnatal period was associated with decreased cognitive test score ( $\beta = -4.83$ , 95% CI: -6.37, -3.29) adjusted for all possible studied covariates. However, similar results were not observed in the prenatal exposed groups ( $\beta = -0.62$ , 95% CI: -2.77, 1.54).

**Conclusions:** Famine exposure during early life, specifically postnatal exposure window was associated with adulthood cognitive function. This study therefore highlights the importance of improving nutritional status during the postnatal period of child growth and development in ways that stimulate adulthood cognitive function. This finding also provides further evidence for the hypothesis of developmental origin of adult disease. further studies are needed to elucidate the potential mechanism behind this association.

**Keywords:** Famine exposure, early life adulthood, cognitive function, Ethiopia

### Strengths and limitations of this study

- This is the first study investigate the relationship between early life exposure to famine and adulthood cognitive function in Ethiopia.
- Considering timing of exposure in assessing the effect of famine exposure in early life on adulthood cognitive function is also one of strength of the study. However, our study acknowledges the following limitations.
- The findings might be partly biased by self-selection effects. It is plausible that potential participants couldn't participate because of health related problems, and others may have already died due to the exposure.
- Exposure to the famine was defined using the self-reported birth date and age, thus recall bias cannot be ruled out. However, it is at our utmost belief that the exceptional catastrophic period of the famine, named as ‘Kefu Qan’ by the local people or translated as known as “Evil Days in the memory of the survivors and the world could not forgettable.
- The long-term consequence of the famine likely depend on the severity of the exposure within the household which could not be measured due to the global nature of the famine where no household was invulnerable.
- Finally, factors such as parent-child bond, early childhood experiences and trauma have not been accounted for as potential confounding factors.

## Introduction

Ethiopia had passed through long and troubled history of famines due to desertification and frequent severe rainfall failure (1). Notably, a widespread famine affected the country from 1983- 1985, where its epicenter was the northeast region of the country namely, Tigray and Wollo (2-4). It was ranked as “Great Famine” due to its global impact in famine scale and also known as the “Great Ethiopian Famine” due to its unprecedented high causality compared with any famine ever happened in Ethiopia or Africa (5, 6). In the memory of the famine survivors, it was named as “Kefu Qan” or translated as known as “Evil Days” (7). Over half a million deaths were occurred during the famine (8).

Cognition represents a complex set of higher mental functions controlled by the brain, which includes attention, memory, thinking, learning, and perception (9). Nutrition during early life is the fundamental determinants of neuro-developmental process. Malnutrition during this critical period of growth and development alters brain structure and neuronal connectivity and more prone to neurodevelopmental impairments (10). The human brain began to form at about two weeks during prenatal life and reach 80% of its adult size by the first two years after birth. Consequently, neurodevelopmental impairment in early life affects later performance of adults ability to learn and productivity (11, 12)

The broader understanding of the devastating short term consequences of famine such as mass migrations of people in search of food, social breakdown, loss of personal pride and morality were clearly known (13). However, the long term impact of the famine exposure is yet to be explored. Elsewhere, famine exposure in the early life, particularly the prenatal and postnatal period is the stages with magnificent growth and development, thus any change during this period could affect adulthood cognitive function (10, 14).

Adulthood cognitive function is thought to be the result of complex interactions between genetic and environmental factors including nutrition and psychosocial adversities in early life (15, 16) and behavioral related factors in later life such as physical activity, smoking, alcohol drinking, socioeconomic, demographic and dietary pattern (17, 18).

1  
2  
3 Nevertheless, context specific factors specifically those related to intrinsic attributes of  
4 once biology are usually neglected, as those are considered as non-modifiable (19).  
5  
6 Investigators, such as Barker and his colleagues, have introduced a theory called “fetal  
7 origin of adult diseases (FOAD)” or “developmental origins of health and disease  
8 (DOHaD)” to explain the adulthood diseases resulted from early life nutritional insult  
9  
10 (20, 21).  
11  
12

13  
14 Empirical understanding of the link between adulthood cognitive function with early life  
15 adverse environment requires natural environment such as famine, migration, stress and  
16 disaster(22). A number of studies have reported the association between famine exposure  
17 in early life and cognitive function in adult life (23-26).  
18  
19  
20

21  
22 One of the best opportunity to deeply understand the long term consequence of early life  
23 adverse exposure is famine. More specifically, global famine such as the “Great Ethiopian  
24 Famine” of 1983-85 can be taken as a natural exposure to explore the long term assaults  
25 of early life undernutrition. Presumably, such studies may explain the cognitive related  
26 problems in Ethiopia and also give more insights on the hypothesis called DOHaD. As  
27 far as the authors’ best search, no study has been ever conducted or documented to explore  
28 the nutrition and cognitive function of these segment of the population thus far. Hence,  
29 we conducted this study to evaluate the effects of prenatal and postnatal exposure to  
30 famine on adulthood cognitive function among the survivors of the 1983-85 global  
31 famine in Northeast Ethiopia.  
32  
33  
34  
35  
36  
37  
38  
39  
40  
41  
42  
43  
44  
45  
46  
47  
48  
49  
50  
51  
52  
53  
54  
55  
56  
57  
58  
59  
60



## Methods and Materials

### Study setting, design and period

The study was conducted in North Wollo Zone, Raya Kobo District, Northeast Ethiopia. Exposure status for the area, Raya Kobo District was selected purposively as this place was the epicenter of 1983-85 Great Ethiopian famine (2). The district has an estimated total population of 228,798 and has 36 kebeles (lowest administrative unit in the district), four of which are urban and the rest are rural kebeles of the district. A historical cohort study design was employed from March 15, to April 30, 2019 to investigate the effect of prenatal and postnatal famine exposure on adulthood cognitive function.

### Study Participants

The study participants to this study were people who have been exposed to the 1983-85 great Ethiopian famine.

### Patient and public involvement

Patients were not involved in the design, or conduct, or reporting, or dissemination plans of our research

## Measurements

### Exposure measurement

The main exposure variable is early life exposure to the 1983-85 Great Ethiopian famine. Self-reported birth date and age of the participants were used to classify famine exposure status. Based on the timing of exposure, there were prenatal and postnatal exposures to famine. Famine exposure windows were determined using the famine start and end dates previously described (2). Accordingly, the study participants were categorized into three groups: non-exposed group (age =30-32 years, birth year = 1987 – 1988, n=357), prenatal exposed group (age =34-36, birth year = 1983, 1985, n= 359), postnatal-exposed group (age = 37-38, birth year = 1981-1983, birth- two years old during the famine, n= 356) ([supplementary file 1](#)). For this study, a total of 1072 participants were recruited with the guidance of developmental army and health extension workers of the community. Finally, 1047 participants who had completed data on all variables required

1  
2  
3 in the analysis were used for statistical comparison. Multistage stratified random  
4 sampling technique was used to reach the final sample size (**figure 1**). Participants born  
5 immediately after the end of famine were uncategorized and considered as the  
6 transitional period because of uncertainties in their exposure to famine and this helps to  
7 reduce misclassification bias. Thus, subjects born between 8 September 1986 to 30  
8 August 1987 were excluded from the study. Adults displaced to other area of the country  
9 and those who were in other location during the famine and seriously ill were excluded  
10 from the study.  
11  
12  
13  
14  
15

### 16 17 **Outcome measurement**

18  
19 The outcome of the study was cognitive test performance among adult participants.  
20 Montreal Cognitive Assessment (MoCA)-basic tool was used to assess subjects'  
21 cognitive performance (27). Eight data collectors were involved in assessing the cognitive  
22 function of participants and each hold a minimum of diploma in clinical nursing and have  
23 significant experience as a research nurse. Three days of training on administration of the  
24 test and scoring of the test result was provided for the selected data collectors. The  
25 questionnaire was first prepared in English and then translated into Amharic (the local  
26 language) and back into English to ensure consistency.  
27  
28  
29  
30  
31  
32  
33

### 34 **Covariate measurement**

35  
36 A household wealth index score was generated from durable assets owned by the  
37 household using principal component analysis Physical activity was assessed by using  
38 the International Physical Activity Questionnaire (IPAQ). Participants who uses a  
39 specified substance (smoking, drinking and Khat chewing) in the past three months and  
40 once in their life time were considered as current users and ever users respectively (28).  
41 Height of the study subjects was measured to the nearest 0.1 cm using a stadiometer  
42 (Seca®, Germany) with the subjects positioned at the Frankfurt Plane and the four points  
43 (heel, calf, buttocks and shoulder) touching the vertical stand and their shoes taken off.  
44 Weight was measured using portable battery operated Seca® digital scale. Body mass  
45 index (BMI) was calculated as the weight in kilogram divided by height in meters squared  
46 ( $\text{kg}/\text{m}^2$ ). Dietary pattern was assessed using unquantified food frequency questionnaire  
47 (FFQ) composed of 38 food types covering the main food consumed in the study area.  
48 As there is no Ethiopian classification of food groups, the 38 food items of the food  
49  
50  
51  
52  
53  
54  
55  
56  
57  
58  
59  
60

1  
2  
3 frequency questionnaire were grouped into seven groups [cereals, vegetables and fruits,  
4 dairy products, protein foods, oils, others] according to the Food and Agricultural  
5 organization (FAO) food groups. A dietary pattern was derived by using K-means cluster  
6 analysis. Two major dietary patterns were identified the healthy and unhealthy dietary  
7 pattern' based on the participant's fruits and vegetable consumption. The healthy dietary  
8 pattern indicates high consumption of fruits and vegetables and the unhealthy dietary  
9 pattern indicates low fruits and vegetables consumptions.  
10  
11  
12  
13  
14

### 15 **Statically analysis**

16  
17 The data was double entered to Epidata 3.1 and exported to SPSS version 25 ([SPSS Inc.  
18 version 25, Chicago, Illinois] for analysis. Continuous variables were reported as mean  
19 and standard deviation ( $\pm$  SD) when normally distributed or medians and interquartile  
20 ranges (IQR) for skewed distribution. Categorical variables were described as  
21 percentages and compared using Pearson chi-square test. Differences in mean cognitive  
22 test score among different groups were compared using analysis of variance (ANOVA)  
23 or T-test.  
24  
25  
26  
27  
28  
29

30 Linea regression analysis was used to examine the association between famine exposure  
31 in earl life and cognitive test score. The estimate ( $\beta$ -coefficients) and 95% CI were  
32 reported to describe the associations. Covariates were selected based on evidence from  
33 existing literature and the presence of biologically plausible relationships between the  
34 covariates and the outcome variable. When the regression coefficients of the exposure  
35 variables changed more than 10% after adding a variable and when the covariate was  
36 significantly associated with the outcome, this covariate was considered as a confounder  
37 and included in further models. Five sets of regression models were developed. Model 1:  
38 included the outcome and the main exposure variable (famine exposure status). Model 2:  
39 built on model one by adding sex and age. Model 3: built on model 2 by adding  
40 educational status, wealth index, marital status, residency and occupational status. Model  
41 4: built on model 3 by adding smoking status, drinking status, Khat chewing status and  
42 physical activity. Model 5 (full adjusted model) built on model 4 by adding body mass  
43 index and dietary pattern. The rationale of the different models was to observe changes  
44 in the association between the main exposure and outcome variable when different sets  
45 of covariates were accounted for in the model. The outcome variable, cognitive test score  
46  
47  
48  
49  
50  
51  
52  
53  
54  
55  
56  
57  
58  
59  
60

was tested for normality using a P-P plot and a steam leaf diagram, and all potential confounders were tested for linearity with the outcome variable using scatter plots. Multicollinearity diagnosis was checked by using variance inflation factor (VIF<10). Moreover, stratified analysis with sex was performed and the interaction of famine exposed groups with residency was performed by likelihood ratio test. P-values presented were based on two-tailed test and  $P < 0.05$  was considered statistically significant.

## Results

### Background characteristics

A total of 1047 adults had complete data for all variables included in the analysis. Six hundred ninety-seven (66.6%) of the participants were exposed and 350 (34.4%) of the were non-exposed group. Of these, 350 (33.4%), 348 (33.2%) and 349 (33.3%) were non-exposed, prenatal-exposed and postnatal-exposed respectively. The mean ( $\pm$ SD) ages for exposed and non-exposed groups were 35.3 (1.4) and 31.2(0.70). The mean ( $\pm$  SD) age of non-exposed, prenatal exposed and postnatal exposed groups were 31.20 (0.66), 35.05 (0.86) and 37.60 (0.86) respectively. The mean ( $\pm$  SD) ages for males and females were 34.29 (2.79) and 34.89 (2.79). Two-hundred ten (36.0%) were females exposed to famine during postnatal period (**Table 1**).

### Cognitive test score

The mean ( $\pm$ SD) cognitive test score among the non-exposed and exposed groups were  $21.11 \pm 6.90$  and  $17.95 \pm 7.43$  respectively. While, the mean ( $\pm$  SD) cognitive test score based on the time of exposure for each group were as follows: Prenatal exposed  $19.43 \pm 6.60$ , postnatal  $16.48 \pm 6.7$ . There were differences in cognitive test score between non-exposed groups and famine exposed groups ( $p$ -value  $< 0.001$ ) (**Table 2**). Exposure to famine during postnatal had significantly lower cognitive test score (**Figure 2**). The mean ( $\pm$  SD) cognitive score was  $18.37 \pm 7.24$  for non-exposed female and  $14.58 \pm 7.92$  for postnatal exposed females. The mean ( $\pm$  SD) cognitive score was  $23.67 \pm 5.42$  for non-exposed male and  $19.36 \pm 7.00$  for postnatal exposed male (**Figure 3**).

## Association between famine exposure in early life and adulthood cognitive functions

Compared with the non-exposed group, the exposed group had low cognitive score. Adults having early life famine exposure were 3.2 points decreased cognitive test score ( $\beta = -3.2$ , 95% CI: -4.1, -2.3). Exposure to famine during postnatal life was associated with a 4.83 points decrease in cognitive test score ( $\beta = -4.83$ , 95% CI: -6.37, -3.29) in the full adjusted model (**Table 3**). However, Exposure to famine during prenatal period was not significantly associated with adulthood cognitive test score. Males had higher cognitive test score ( $\beta = 1.22$ , 95% CI: 0.34, 2.11) in the final model (result not shown). The effect of famine exposure in early life was not modified by sex and residency ( $P$  interaction > 0.05) (result not shown)

## Role of covariates

Although different models were developed to account for different sets of potential confounders, the association between postnatal famine exposure and adulthood cognitive function remained significant. The highest risk for decreased cognitive test score ( $\beta = 4.16$ , 95% CI (-5.18, -3.13)) was observed after adjusted for sex and age at early childhood exposed group. Moreover, male sex and higher education (secondary and above) were positively associated with increased cognitive test score. Meanwhile, household wealth index was associated decreased score of cognitive test (data not shown).

## Discussion

The main concern of this study was to examine the association between early life famine exposure and adulthood cognitive function. The focus of this article was thus the contribution of factors beyond socioeconomic, demographic, psychosocial adversaries in early life and other established determinants of adulthood cognitive function (17, 18, 29). We found that being exposed to famine during postnatal life was associated with decreased cognitive test score by 4.83 points when examining the association between famine exposure in early life with adulthood cognitive function using simple linear regression. This finding have been confounded by other predictors of cognitive status in adults. Then we adjusted for potential confounders including sex, age, body mass index, dietary pattern, smoking status, drinking status, Khat chewing status and physical activity, educational status, marital status, residency, occupational status and wealth index.

1  
2  
3 However, in all the adjusted models famine exposure in early childhood remained  
4 significant. On the contrary, famine exposure during prenatal period was not associated  
5 with adulthood cognitive test score in the final model. Male sex and educational status  
6 was positively associated cognitive function, while wealth index was negatively  
7 associated with it.  
8  
9  
10

11  
12 The finding that postnatal exposure to famine, but not prenatal exposure was associated  
13 with adulthood cognitive indicate the role of adequate nutrition during postnatal period  
14 (birth to 24 months of postnatal life) for determine adulthood cognitive function. This  
15 doesn't rule out the importance of nutrition during prenatal period on the cognitive status  
16 of adults. Although, there was no statistically significant association between prenatal  
17 famine exposure and adulthood cognitive function in final linear regression model, the  
18 mean cognitive test score was lower, as compared to the non-exposed group (mean  
19 difference = 1.68).  
20  
21  
22  
23  
24  
25

26  
27 The following reasons may explain the associations of postnatal famine exposure, but not  
28 prenatal exposure on adulthood cognitive function: The first two years of postnatal  
29 period is the time for fastest growth and development of brain and double its size  
30 both of which are accompanied by highest energy and protein demand in human life  
31 (30). For instance, the development of the frontal lobes which is responsible for higher  
32 cognitive functions including planning, sequencing and self-regulation appears to occur  
33 in growth spurts during the first two years of life after birth (31). Thus nutritional  
34 deprivation during early life hampers the growth and development of the brain resulting  
35 in restricted cognitive functions during later in life (32). Moreover, malnutrition during  
36 the first two years of life affects growth, motor development and behavior of children to  
37 explore their environment through which it influence the maturity of the brain in early in  
38 postnatal life (33). Protein- energy malnutrition during the postnatal period resulted in  
39 smaller brain size related with fewer neurons, simpler synaptic connections and reduced  
40 concentration of neurotransmitters growth factors altogether contribute for poorer long  
41 term cognitive outcomes (34).  
42  
43  
44  
45  
46  
47  
48  
49  
50  
51

52  
53 The mechanisms whereby early life famine exposure affects adulthood cognitive function  
54 was still unclear. Nonetheless, we comprehended the following reasons to explain the  
55 associations. Exposure to moderate to severe malnutrition in early life could alter  
56  
57  
58  
59  
60

1  
2  
3 permanently the structure and function of the brain which could increase the risk of neuro  
4 cognitive impairment in early childhood period and the association may persist into adult  
5 life. The Developmental origin of health and diseases hypothesis indicates that  
6 malnourishment during fetal phase and first two years after birth could increase the risk  
7 of neurodegenerative disease in later life (35). Thus, malnourishment during the very  
8 beginning of life could result in a permanent deficit to brain structures (10, 14, 27).  
9  
10  
11  
12  
13 Animal studies(36, 37) and human studies (23, 26, 38, 39) have provided strong evidence  
14 for the hypothesis. In addition, epigenetic changes might be another potential mechanism  
15 that facilitated to understand the association between famine exposure in early life and  
16 the risk of cognitive impairment in adult life (40, 41). In Barbados Nutrition Study (BNS,  
17  
18  
19 long lasting DNA methylation changes associated with liability for defective attention  
20 and cognition in adult life was observed (42).  
21  
22  
23

24 The findings in the present study was consistent with studies conducted in China famine  
25 birth cohort of the year 1959-61 (24, 25, 38). However, it was inconsistent with the study  
26 conducted in another Chinese study (23). These variations could be explained by the  
27 heterogeneity of test tools. Mini-Mental Status examination (MMSE) was used to  
28 measure cognitive function in Chinese study. The present study uses Montreal Cognitive  
29 assessment (MoCA) to measure cognitive function. Our study also observed that famine  
30 exposure during prenatal period was not associated with adulthood cognitive function.  
31  
32  
33  
34  
35 The finding is consistent with study of Dutch famine birth cohort study, (de Groot et  
36 al.,2010) reported that that there is no association between famine exposure in prenatal  
37 life and cognitive decline in adults (43). Similarly, a follow up study conducted in  
38 Hertfordshire revealed that cognitive performance in adult life was not associated with  
39 impaired fetal growth (44).  
40  
41  
42  
43  
44

45 The presents study findings may extend our understanding of the long term impact of  
46 undernutrition and also lay the justification to extend our understanding of the genetic  
47 and epigenetic mechanisms of nutrition related cognitive impairment in later life. More  
48 interestingly, these findings may partly explain the reason behind cognitive related  
49 problems in Ethiopia, a country known for history of chronic food insecurity.  
50  
51  
52  
53  
54 Furthermore, these findings may help policy makers to lay context specific strategies  
55 peculiar to famine exposed regions of the country.  
56  
57  
58  
59  
60



## Conclusion

Famine exposure during early life, specifically postnatal exposure window was associated with adulthood cognitive function. This study therefore highlights the importance of improving nutritional status during the postnatal period of child growth and development in ways that stimulate adulthood cognitive function. This finding also provides further evidence for the hypothesis of developmental origin of adult disease. further studies are needed to elucidate the potential mechanism behind this association.

### Author affiliations

<sup>1\*</sup>Department of Nutrition and Dietetics, College of Health Sciences, Debre Tabor University, Debre Tabor, Ethiopia

<sup>1,2</sup>Department of Nutrition and Dietetics, Institute of Health, Jimma University, Jimma, Ethiopia

<sup>3</sup>Department of Psychiatry, Faculty of Medical Sciences, Jimma University, Jimma, Ethiopia

<sup>4</sup>Department of Obstetrics and Gynecology, Faculty of Medical Sciences, Jimma University, Jimma, Ethiopia

<sup>5</sup>Misra Abdulahi, Department of Population and Family Health, Institute of Health, Jimma University, Jimma, Ethiopia

**Acknowledgements** we would like to acknowledge the Institute of Health, Jimma University for funding the study. We are also grateful to the study participants for their dedicated time and volunteer participation.

**Funding** The study was funded by Jimma University, Institute of Health. The funder has no role in the design, implementation, analysis, and in the interpretation or write up of the manuscript.

**Data sharing statement** Extra data is available from the corresponding author on request.



**Contributorship statement** Getachew Arage and Dr. Kalkidan Hassen conceived and planned the study. Getachew Arage, Prof. Tefera Belachew, Dr. Mubarek Abera, Dr. Fedilu Abdulhay, Misra Abdulahi and Dr. Kalkidan Hassen implemented the study. Getachew Arage and Dr. Kalkidan Hassen did the analysis. Getachew Arage drafted the manuscript. Dr. Mubarek Abera, prof. Tefera Belachew, Dr. Fedilu Abdulhay, Misra Abdulahi and Dr. Kalkidan Hassen reviewed the manuscript. All authors gave input to the manuscript, read and approved the final version.

**Consent for publication** This is not applicable as the study does not have individual person's data.

**Conflict of interest interests** The authors declare no conflicts of interest

**Ethics approval Ethical** clearance was obtained from Institutional Review Board of Jimma University (Ref. No. JHRPGD/660/2019).

## References

1. De Waal A. Evil days: Thirty years of war and famine in Ethiopia: Human Rights Watch; 1991.
2. Dercon S, Porter C. Live aid revisited: long-term impacts of the 1984 Ethiopian famine on children. *Journal of the European Economic Association*. 2014;12(4):927-48.
3. Rahmato D. Famine and survival strategies: a case study from Northeast Ethiopia: Nordic Africa Institute; 1991.
4. Keller EJ. Drought, war, and the politics of famine in Ethiopia and Eritrea. *The Journal of Modern African Studies*. 1992;30(4):609-24.
5. Gráda C. Making famine history. *Journal of Economic Literature*. 2007;45(1):5-38.
6. Chattopadhyay R. Politics and Economics: Extending Entitlement Analysis. 1996.
7. Watch A. Evil days: 30 years of war and famine in Ethiopia. Washington DC: Human Rights Watch. 1991.
8. Kidane A. Mortality estimates of the 1984-85 Ethiopian famine. *Scandinavian journal of social medicine*. 1990;18(4):281-6.
9. Bhatnagar S, Taneja S. Zinc and cognitive development. *The British journal of nutrition*. 2001;85 Suppl 2:S139-45.
10. Cusick SE, Georgieff MK. The role of nutrition in brain development: the golden opportunity of the "first 1000 days". *The Journal of pediatrics*. 2016;175:16-21.
11. Boyle PA, Yu L, Wilson RS, Segawa E, Buchman AS, Bennett DA. Cognitive decline impairs financial and health literacy among community-based older persons without dementia. *Psychology and aging*. 2013;28(3):614-24.
12. Martorell R. Improved nutrition in the first 1000 days and adult human capital and health. *American Journal of Human Biology*. 2017;29(2):e22952.
13. Scrimshaw NS. The phenomenon of famine. *Annual review of nutrition*. 1987;7(1):1-22.

14. Nyaradi A, Li J, Hickling S, Foster J, Oddy WH. The role of nutrition in children's neurocognitive development, from pregnancy through childhood. *Frontiers in human neuroscience*. 2013;7:97.
15. Xu C, Sun J, Duan H, Ji F, Tian X, Zhai Y, et al. Gene, environment and cognitive function: a Chinese twin ageing study. *Age and ageing*. 2015;44(3):452-7.
16. Behrman J, Hodinott J, Maluccio JA, Soler-Hampejsek E, Behrman EL, Martorell R, et al. What determines adult cognitive skills? Impacts of pre-schooling, schooling and post-schooling experiences in Guatemala. 2006.
17. Aartsen MJ, Cheval B, Sieber S, Van der Linden BW, Gabriel R, Courvoisier DS, et al. Advantaged socioeconomic conditions in childhood are associated with higher cognitive functioning but stronger cognitive decline in older age. *Proceedings of the National Academy of Sciences*. 2019;116(12):5478-86.
18. Reas ET, Laughlin GA, Bergstrom J, Kritz-Silverstein D, McEvoy LKJoAsD. Physical Activity and Trajectories of Cognitive Change in Community-Dwelling Older Adults: The Rancho Bernardo Study. 2019;71(1):109-18.
19. Baird J, Jacob C, Barker M, Fall CH, Hanson M, Harvey NC, et al., editors. Developmental origins of health and disease: a lifecourse approach to the prevention of non-communicable diseases. *Healthcare*; 2017: Multidisciplinary Digital Publishing Institute.
20. Barker DJ. In utero programming of chronic disease. *Clinical science*. 1998;95(2):115-28.
21. Gluckman PD, Hanson MA, Cooper C, Thornburg KL. Effect of in utero and early-life conditions on adult health and disease. *New England Journal of Medicine*. 2008;359(1):61-73.
22. Moraru A, De Almeida MM, Degryse J-M. PALTEM: What Parameters Should Be Collected in Disaster Settings to Assess the Long-Term Outcomes of Famine? *International journal of environmental research and public health*. 2018;15(5):857.
23. Wang C, An Y, Yu H, Feng L, Liu Q, Lu Y, et al. Association between exposure to the Chinese famine in different stages of early life and decline in cognitive functioning in adulthood. *Frontiers in Behavioral Neuroscience*. 2016;10:146.
24. Xu H, Zhang Z, Li L, Liu J. Early life exposure to China's 1959–61 famine and midlife cognition. *International journal of epidemiology*. 2018;47(1):109-20.
25. Rong H, Lai X, Mahmoudi E, Fang H. Early-Life Exposure to the Chinese Famine and Risk of Cognitive Decline. *Journal of clinical medicine*. 2019;8(4):484.
26. De Rooij SR, Wouters H, Yonker JE, Painter RC, Roseboom TJ. Prenatal undernutrition and cognitive function in late adulthood. *Proceedings of the National Academy of Sciences*. 2010;107(39):16881-6.
27. Julayanont P, Tangwongchai S, Hemrungron S, Tunvirachaisakul C, Phanthumchinda K, Hongsawat J, et al. The montreal cognitive assessment—basic: a screening tool for mild cognitive impairment in illiterate and low-educated elderly adults. *Journal of the American Geriatrics Society*. 2015;63(12):2550-4.
28. McNeely J, Strauss SM, Wright S, Rotrosen J, Khan R, Lee JD, et al. Test–retest reliability of a self-administered Alcohol, Smoking and Substance Involvement Screening Test (ASSIST) in primary care patients. *Journal of substance abuse treatment*. 2014;47(1):93-101.
29. Behrman JR, Hodinott J, Maluccio JA, Soler-Hampejsek E, Behrman EL, Martorell R, et al. What determines adult cognitive skills? Influences of pre-school, school, and post-school experiences in Guatemala. *Latin American economic review*. 2014;23(1):4.
30. Sgarbieri VC, Pacheco MTB. Human development: from conception to maturity. *Brazilian Journal of Food Technology*. 2017;20.
31. Bryan J, Osendarp S, Hughes D, Calvaresi E, Baghurst K, van Klinken J-W. Nutrients for cognitive development in school-aged children. *Nutrition reviews*. 2004;62(8):295-306.

- 1  
2  
3 32. Yam K-Y, Naninck EF, Schmidt MV, Lucassen PJ, Korosi A. Early-life adversity programs  
4 emotional functions and the neuroendocrine stress system: the contribution of nutrition,  
5 metabolic hormones and epigenetic mechanisms. *Stress*. 2015;18(3):328-42.
- 6 33. Rice D, Barone Jr S. Critical periods of vulnerability for the developing nervous system:  
7 evidence from humans and animal models. *Environmental health perspectives*.  
8 2000;108(suppl 3):511-33.
- 9 34. Georgieff MK. Early brain growth: macronutrients for the developing brain.  
10 *NeoReviews*. 2006;7(7):e334-e43.
- 11 35. Power C, Kuh D, Morton S. From developmental origins of adult disease to life course  
12 research on adult disease and aging: insights from birth cohort studies. *Annual review of public*  
13 *health*. 2013;34:7-28.
- 14 36. Pérez-García G, Guzmán-Quevedo O, Aragão RDS, Bolaños-Jiménez F. Early  
15 malnutrition results in long-lasting impairments in pattern-separation for overlapping novel  
16 object and novel location memories and reduced hippocampal neurogenesis. *Scientific*  
17 *reports*. 2016;6(1):1-12.
- 18 37. Coupé B, Dutriez-Casteloot I, Breton C, Lefèvre F, Mairesse J, Dickes-Coopman A, et al.  
19 Perinatal undernutrition modifies cell proliferation and brain-derived neurotrophic factor  
20 levels during critical time-windows for hypothalamic and hippocampal development in the  
21 male rat. *Journal of neuroendocrinology*. 2009;21(1):40-8.
- 22 38. Rong H, Xi Y, An Y, Tao L, Zhang X, Yu H, et al. The correlation between early stages of  
23 life exposed to Chinese famine and cognitive decline in adulthood: nutrition of adulthood plays  
24 an important role in the link? *Frontiers in aging neuroscience*. 2018;9:444.
- 25 39. Crookston BT, Dearden KA, Alder SC, Porucznik CA, Stanford JB, Merrill RM, et al.  
26 Impact of early and concurrent stunting on cognition. *Maternal & Child Nutrition*.  
27 2011;7(4):397-409.
- 28 40. Meaney MJ, Szyf M, Seckl JR. Epigenetic mechanisms of perinatal programming of  
29 hypothalamic-pituitary-adrenal function and health. *Trends in molecular medicine*.  
30 2007;13(7):269-77.
- 31 41. Lagali P, Corcoran C, Picketts D. Hippocampus development and function: role of  
32 epigenetic factors and implications for cognitive disease. *Clinical genetics*. 2010;78(4):321-33.
- 33 42. Peter CJ, Fischer LK, Kundakovic M, Garg P, Jakovcevski M, Dincer A, et al. DNA  
34 Methylation Signatures of Early Childhood Malnutrition Associated With Impairments in  
35 Attention and Cognition. *Biological psychiatry*. 2016;80(10):765-74.
- 36 43. de Groot RH, Stein AD, Jolles J, van Boxtel MP, Blauw G-J, Van de Bor M, et al. Prenatal  
37 famine exposure and cognition at age 59 years. *International Journal of Epidemiology*.  
38 2011;40(2):327-37.
- 39 44. Martyn CN, Gale CR, Sayer AA, Fall C. Growth in utero and cognitive function in adult  
40 life: follow up study of people born between 1920 and 1943. *Bmj*. 1996;312(7043):1393-6.
- 41  
42  
43  
44  
45  
46  
47  
48

## 49 **List of tables**

50 **Table 1:** Background characteristics of the study participants according to Ethiopian  
51 famine exposure status, Northeast Ethiopia, 2019 (n= 1047)  
52  
53  
54  
55  
56  
57  
58  
59  
60

| Variables                                | Non-exposed group<br>n = 350 | Prenatal exposed group<br>n = 348 | postnatal exposed<br>n= 349 | <i>P</i> -value |
|------------------------------------------|------------------------------|-----------------------------------|-----------------------------|-----------------|
| Age in years, mean $\pm$ SD              | 31.20 $\pm$ 0.66             | 35.05 $\pm$ 0.86                  | 37.62 $\pm$ 0.50            | <0.001*         |
| Sex, n (%)                               |                              |                                   |                             |                 |
| Female                                   | 169 (48.3%)                  | 205 (58.9%)                       | 210 (60.2%)                 | 0.002*          |
| Male                                     | 181(51.7%)                   | 143 (41.1%)                       | 139 (39.8%)                 |                 |
| Residence, n (%)                         |                              |                                   |                             |                 |
| Urban                                    | 53 (15.2%)                   | 70 (20.1%)                        | 69 (19.7%)                  | 0.165           |
| Rural                                    | 297 (84.8%)                  | 278 (79.8%)                       | 280 (80.3%)                 |                 |
| Educational status                       |                              |                                   |                             |                 |
| Cannot read and write                    | 87 (24.8%)                   | 138 (39.6%)                       | 165( 47.3%)                 |                 |
| Primary school                           | 66 (18.8%)                   | 86 (24.7%)                        | 84 (24.1%)                  |                 |
| Secondary school                         | 116 (33.2%)                  | 72 (20.7%)                        | 57 (16.3%)                  | <0.001*         |
| Above secondary school                   | 81(23.2%)                    | 52 (14.9%)                        | 43 (12.3%)                  |                 |
| Household wealth index, n (%)            |                              |                                   |                             |                 |
| Low                                      | 70 (20.0%)                   | 76 (21.8%)                        | 108 (30.9%)                 |                 |
| Medium                                   | 58 (16.6%)                   | 55 (15.8%)                        | 48 (13.7%)                  | 0.011*          |
| High                                     | 222 (63.4%)                  | 217 (62.4%)                       | 193 (55.4%)                 |                 |
| Marital status , n (%)                   |                              |                                   |                             |                 |
| Single                                   | 102 (29.2%)                  | 54 (15.5%)                        | 59 (16.9%)                  |                 |
| Married                                  | 220(62.8%)                   | 230 (66.1%)                       | 238 (68.2%)                 | <0.001*         |
| Divorced/Widowed                         | 28 (8.0%)                    | 64 (13.4%)                        | 52 (9.2%)                   |                 |
| Current drinker, n (%)                   |                              |                                   |                             |                 |
| Yes                                      | 237 (67.7%)                  | 220 (63.2%)                       | 164 (46.9%)                 | 0.001*          |
| No                                       | 113 (32.3%)                  | 128 (36.8%)                       | 186 (53.3%)                 |                 |
| Ever drinker, n (%)                      |                              |                                   |                             |                 |
| Yes                                      | 110 (31.4%)                  | 122 (35.1%)                       | 182 (52.2%)                 | 0.001*          |
| No                                       | 240 (68.6%)                  | 226 (64.9%)                       | 167 (47.1%)                 |                 |
| Dietary pattern, n (%)                   |                              |                                   |                             |                 |
| Healthy                                  | 125 (35.7%)                  | 113 (32.4%)                       | 89 (25.5%)                  |                 |
| Unhealthy                                | 225 (64.2%)                  | 235 (67.5%)                       | 260 (74.5%)                 | 0.012*          |
| Physical activity level, n (%)           |                              |                                   |                             |                 |
| Low                                      | 6 (1.7%)                     | 4 (1.2%)                          | 51 (14.6%)                  |                 |
| Moderate                                 | 28 (8.0%)                    | 40 (11.5%)                        | 77 (22.1%)                  | <0.001*         |
| High                                     | 316 (90.3%)                  | 304 (87.3%)                       | 221(63.3%)                  |                 |
| BMI (kg/m <sup>2</sup> ), mean $\pm$ SD) | 23.3 $\pm$ 4.83              | 23.06 $\pm$ 5.21                  | 23.36 $\pm$ 4.60            | 0.025*          |

*P*-value represents Independent Samples *t*-tests for continuous variables or  $\chi^2$ -test for categorical variables

\* *P* < 0.05

**Table 2:** Cognitive test score according to Ethiopian famine exposure status, Northeast Ethiopia, 2019 (n= 1047)

| Famine exposure status | Score        | p-value  |
|------------------------|--------------|----------|
| Non- exposed           | 21.11± 6. 90 |          |
| Exposed                | 17.95± 7. 43 | < 0.001* |
| Prenatal exposed       | 19. 43± 6.60 |          |
| Postnatal exposed      | 16.48± 6.7   |          |

\* Indicates statistical significant

**Table 3:** Relation between famine exposure in early life and adulthood cognitive function, Northeast Ethiopia, 2019 (n= 1047)

| Models                     | Prenatal exposed     | postnatal exposed     | p-value |
|----------------------------|----------------------|-----------------------|---------|
| Model 1                    | -1.68 (-2.74, -0.62) | -4.63 (-5.69, -3.57)  | <0.001  |
| R <sup>2</sup> ( adjusted) |                      | 0.065                 |         |
| Model 2                    | -1.26(-0.23, -0.74)  | -4.16(-5.18, -3.13)   | 0.002   |
| R <sup>2</sup> ( adjusted) |                      | 0.13                  |         |
| Model 3                    | -0.56(-3.08, -1.94)  | -1.79 (-3.36, -0.57)  | 0.006   |
| R <sup>2</sup> ( adjusted) |                      | 0.16                  |         |
| Model 4                    | -0.58(-2.74, -1.57)  | -2.22 (-2.99, -2.46)  | <0.001  |
| R <sup>2</sup> ( adjusted) |                      | 0.37                  |         |
| Model 5                    | -0.62(-2.77, 1.54)   | -4.83 (-6.37, -3.29)* | <0.001  |
| R <sup>2</sup> ( adjusted) |                      | 0.39                  |         |

Data are  $\beta$ -coefficients (95% confidence interval) from multiple linear regression analysis

All  $\beta$ -coefficients are related to the non-exposed groups

Model 1 Cognitive test score adjusted for famine exposure status

Model 2 adjusted for sex and age

Model 3 Adjusted for educational status, wealth index, marital status

Model 4 Adjusted for smoking status, drinking status, Khat chewing status and physical activity

Model 5 Adjusted for body mass index and dietary pattern.

Window of exposure to the 1983-1985 Ethiopian Great Famine cohorts, North Wollo Zone, 2019.

| <b>Date of birth<br/>(dd/mm/yyyy)</b>                                   | <b>Exposure to the<br/>famine (August<br/>1983, August<br/>1985)</b> | <b>Age during the famine</b>                | <b>Age in<br/>2019<br/>(Current<br/>age)</b> |
|-------------------------------------------------------------------------|----------------------------------------------------------------------|---------------------------------------------|----------------------------------------------|
| <b>During famine</b><br>08/August/1983-<br>30/August /1985<br>(n=348)   | Prenatal exposed                                                     | Famine exposure during the<br>famine period | 34-36                                        |
| <b>Post-famine</b><br>08/September/1986-<br>30/August/1987              | Transition<br>(Washout period)                                       | One years after the famine                  | 33                                           |
| <b>Pre-famine</b><br>08/September/1981-<br>08/August/1983<br>(n=349)    | Postnatal exposed                                                    | Birth-two years during the<br>famine        | 37-38                                        |
| <b>Post-famine</b><br>08/September/1987-<br>08/October/1988<br>(n= 350) | Non- exposed<br>(reference group)                                    | Two years after the famine                  | 30-32                                        |
| <b>Total sample size</b>                                                |                                                                      | 1047                                        |                                              |

*Dd: days, mm: months, yy: years*

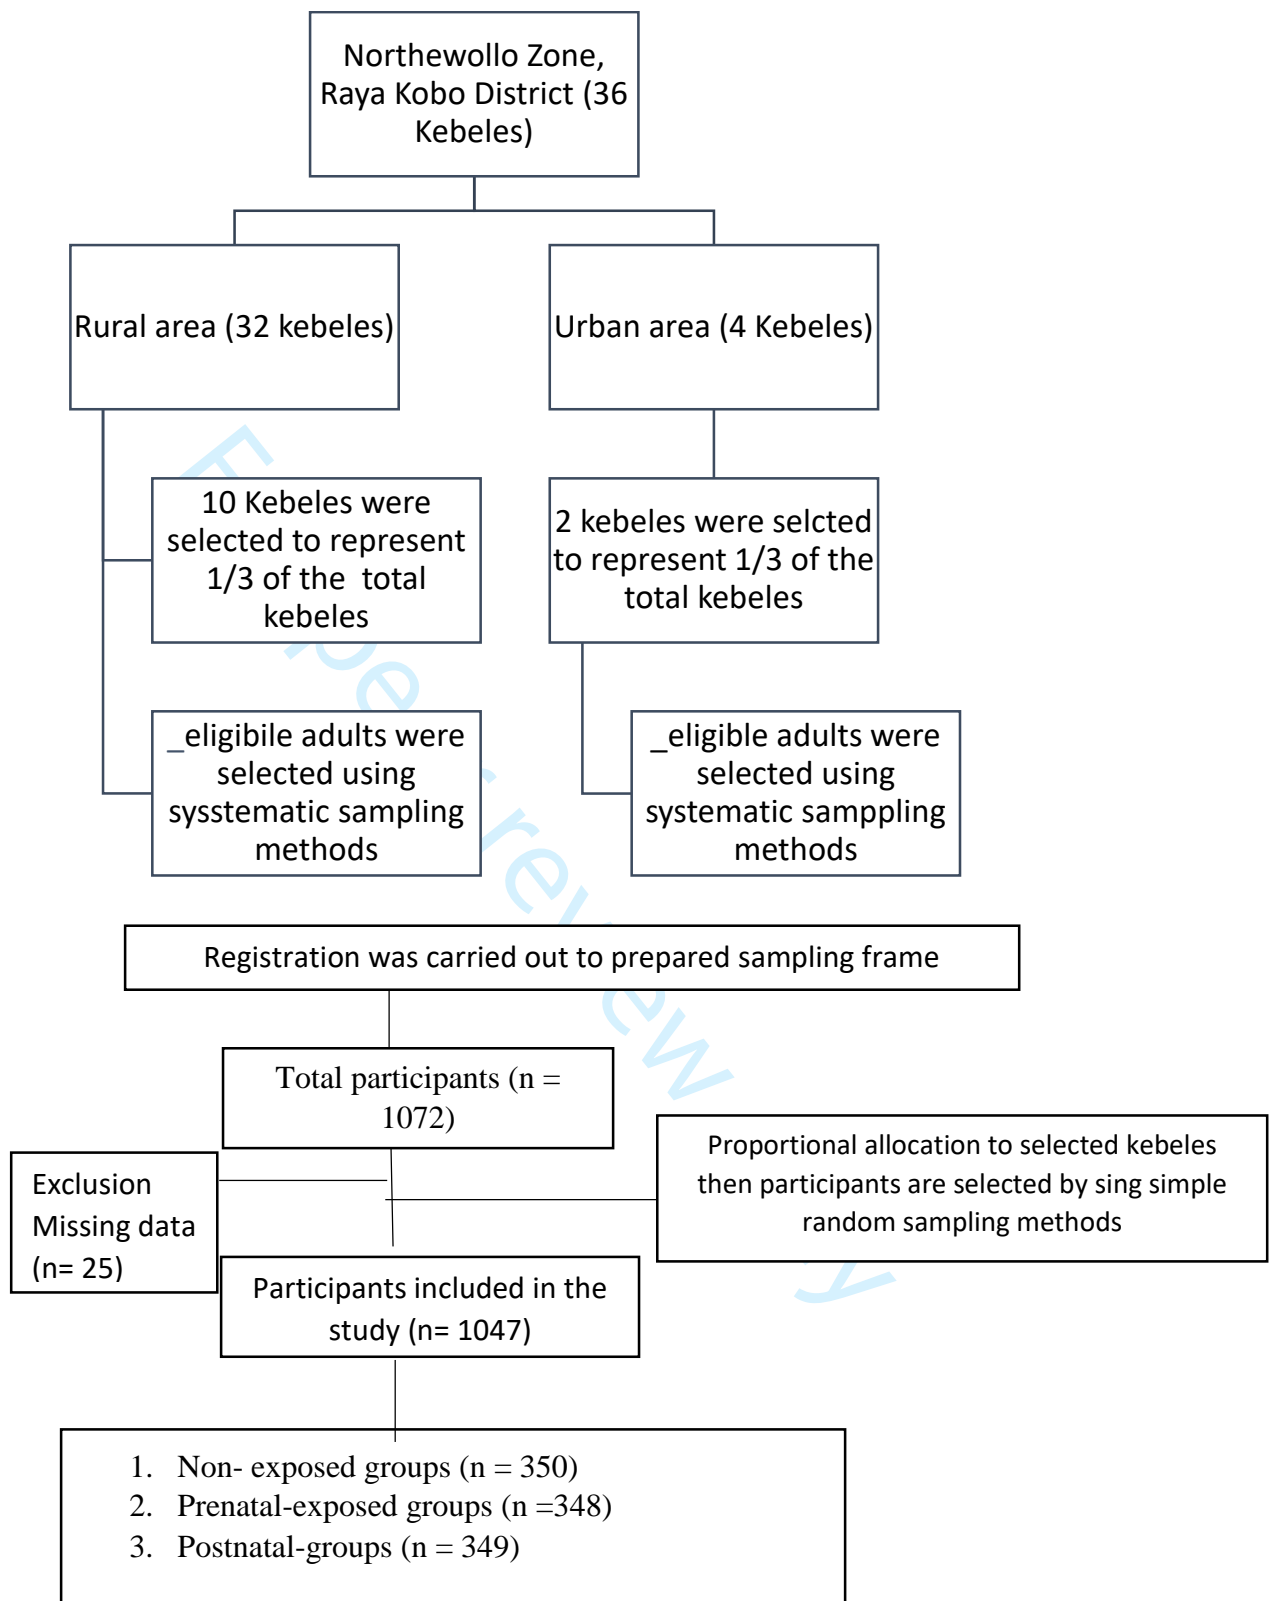

**Figure 1:** Flowchart showing how the final sample size was reached

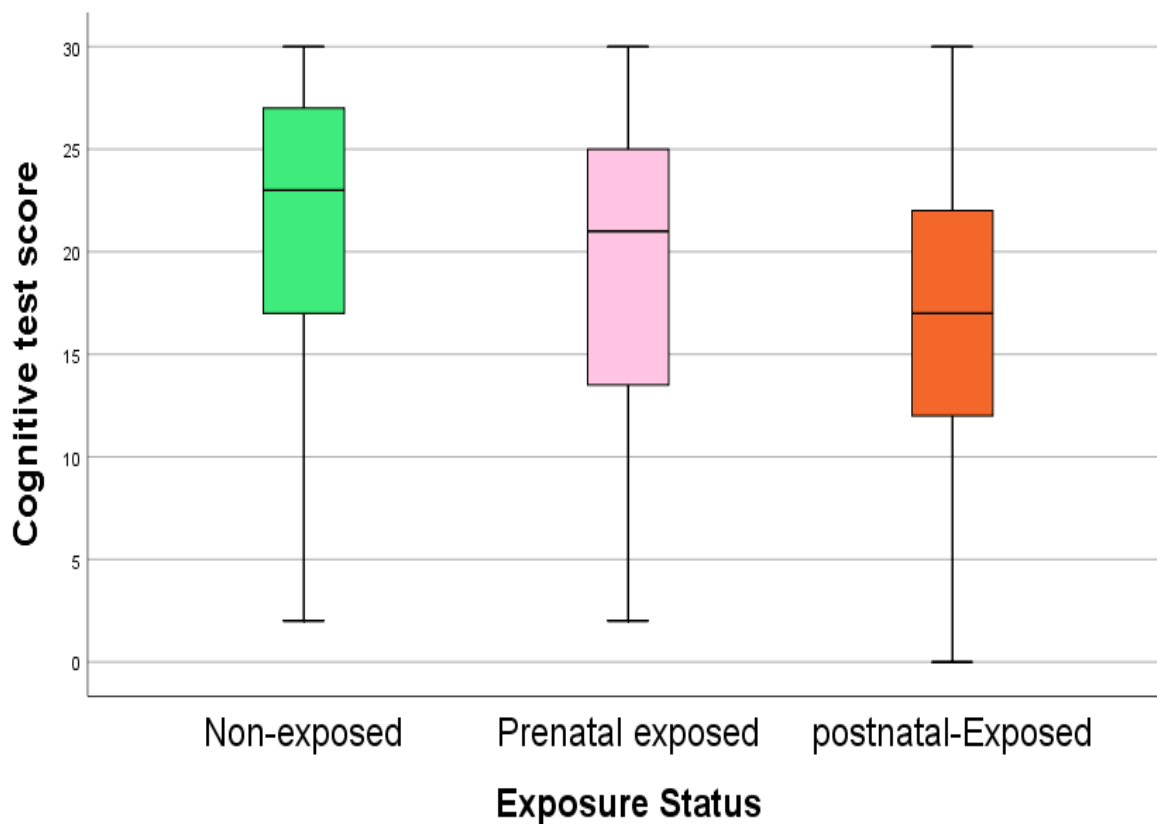

**Figure 2. Distribution of cognitive test score by famine exposure status, Northeast Ethiopia, 2019 (n= 1047)**



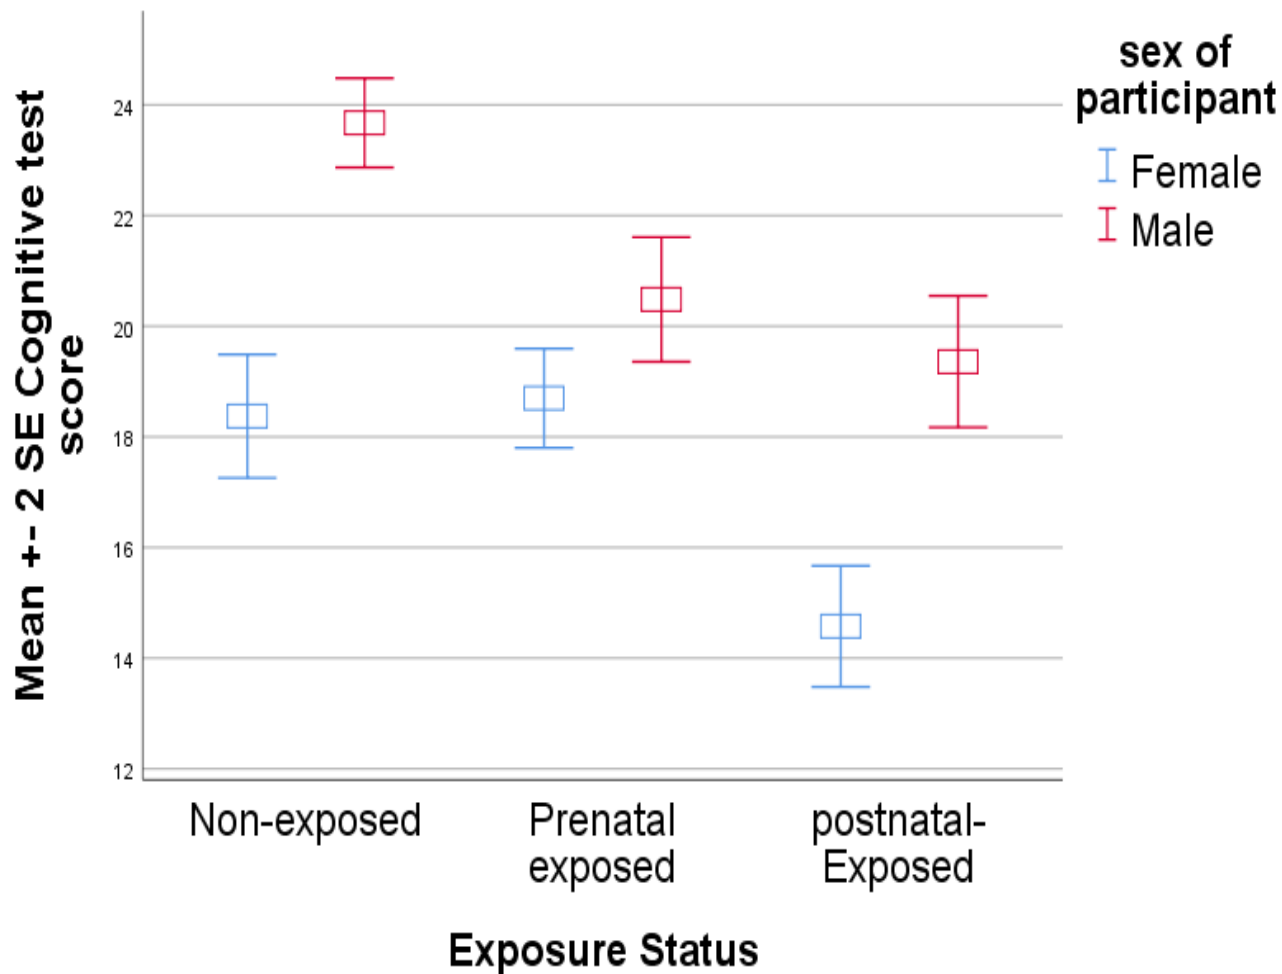

**Figure 3:** The mean and standard deviation of cognitive test score among famine exposed and non-exposed groups stratified by sex, northeast Ethiopia, 2019 (n = 1047)

STROBE Statement—Checklist of items that should be included in reports of *cohort studies*

|                              | Item No | Recommendation                                                                                                                                                                                                                                                                                                                                                                                                |
|------------------------------|---------|---------------------------------------------------------------------------------------------------------------------------------------------------------------------------------------------------------------------------------------------------------------------------------------------------------------------------------------------------------------------------------------------------------------|
| <b>Title and abstract</b>    | 1       | (a) Indicate the study's design with a commonly used term in the title or the abstract<br>(b) Provide in the abstract an informative and balanced summary of what was done and what was found                                                                                                                                                                                                                 |
| <b>Introduction</b>          |         |                                                                                                                                                                                                                                                                                                                                                                                                               |
| Background/rationale         | 2       | Explain the scientific background and rationale for the investigation being reported                                                                                                                                                                                                                                                                                                                          |
| Objectives                   | 3       | State specific objectives, including any prespecified hypotheses                                                                                                                                                                                                                                                                                                                                              |
| <b>Methods</b>               |         |                                                                                                                                                                                                                                                                                                                                                                                                               |
| Study design                 | 4       | Present key elements of study design early in the paper                                                                                                                                                                                                                                                                                                                                                       |
| Setting                      | 5       | Describe the setting, locations, and relevant dates, including periods of recruitment, exposure, follow-up, and data collection                                                                                                                                                                                                                                                                               |
| Participants                 | 6       | (a) Give the eligibility criteria, and the sources and methods of selection of participants. Describe methods of follow-up<br>(b) For matched studies, give matching criteria and number of exposed and unexposed                                                                                                                                                                                             |
| Variables                    | 7       | Clearly define all outcomes, exposures, predictors, potential confounders, and effect modifiers. Give diagnostic criteria, if applicable                                                                                                                                                                                                                                                                      |
| Data sources/<br>measurement | 8*      | For each variable of interest, give sources of data and details of methods of assessment (measurement). Describe comparability of assessment methods if there is more than one group                                                                                                                                                                                                                          |
| Bias                         | 9       | Describe any efforts to address potential sources of bias                                                                                                                                                                                                                                                                                                                                                     |
| Study size                   | 10      | Explain how the study size was arrived at                                                                                                                                                                                                                                                                                                                                                                     |
| Quantitative variables       | 11      | Explain how quantitative variables were handled in the analyses. If applicable, describe which groupings were chosen and why                                                                                                                                                                                                                                                                                  |
| Statistical methods          | 12      | (a) Describe all statistical methods, including those used to control for confounding<br>(b) Describe any methods used to examine subgroups and interactions<br>(c) Explain how missing data were addressed<br>(d) If applicable, explain how loss to follow-up was addressed<br>(e) Describe any sensitivity analyses                                                                                        |
| <b>Results</b>               |         |                                                                                                                                                                                                                                                                                                                                                                                                               |
| Participants                 | 13*     | (a) Report numbers of individuals at each stage of study—eg numbers potentially eligible, examined for eligibility, confirmed eligible, included in the study, completing follow-up, and analysed<br>(b) Give reasons for non-participation at each stage<br>(c) Consider use of a flow diagram                                                                                                               |
| Descriptive data             | 14*     | (a) Give characteristics of study participants (eg demographic, clinical, social) and information on exposures and potential confounders<br>(b) Indicate number of participants with missing data for each variable of interest<br>(c) Summarise follow-up time (eg, average and total amount)                                                                                                                |
| Outcome data                 | 15*     | Report numbers of outcome events or summary measures over time                                                                                                                                                                                                                                                                                                                                                |
| Main results                 | 16      | (a) Give unadjusted estimates and, if applicable, confounder-adjusted estimates and their precision (eg, 95% confidence interval). Make clear which confounders were adjusted for and why they were included<br>(b) Report category boundaries when continuous variables were categorized<br>(c) If relevant, consider translating estimates of relative risk into absolute risk for a meaningful time period |

|    |                          |    |                                                                                        |
|----|--------------------------|----|----------------------------------------------------------------------------------------|
| 1  | Other analyses           | 17 | Report other analyses done—eg analyses of subgroups and interactions, and              |
| 2  |                          |    | sensitivity analyses                                                                   |
| 3  |                          |    |                                                                                        |
| 4  | <b>Discussion</b>        |    |                                                                                        |
| 5  | Key results              | 18 | Summarise key results with reference to study objectives                               |
| 6  | Limitations              | 19 | Discuss limitations of the study, taking into account sources of potential bias or     |
| 7  |                          |    | imprecision. Discuss both direction and magnitude of any potential bias                |
| 8  |                          |    |                                                                                        |
| 9  | Interpretation           | 20 | Give a cautious overall interpretation of results considering objectives, limitations, |
| 10 |                          |    | multiplicity of analyses, results from similar studies, and other relevant evidence    |
| 11 | Generalisability         | 21 | Discuss the generalisability (external validity) of the study results                  |
| 12 |                          |    |                                                                                        |
| 13 | <b>Other information</b> |    |                                                                                        |
| 14 | Funding                  | 22 | Give the source of funding and the role of the funders for the present study and, if   |
| 15 |                          |    | applicable, for the original study on which the present article is based               |
| 16 |                          |    |                                                                                        |

17  
18 \*Give information separately for exposed and unexposed groups.

19  
20  
21 **Note:** An Explanation and Elaboration article discusses each checklist item and gives methodological background and  
22 published examples of transparent reporting. The STROBE checklist is best used in conjunction with this article (freely  
23 available on the Web sites of PLoS Medicine at <http://www.plosmedicine.org/>, Annals of Internal Medicine at  
24 <http://www.annals.org/>, and Epidemiology at <http://www.epidem.com/>). Information on the STROBE Initiative is  
25 available at <http://www.strobe-statement.org>.

26  
27  
28  
29  
30  
31  
32  
33  
34  
35  
36  
37  
38  
39  
40  
41  
42  
43  
44  
45  
46  
47  
48  
49  
50  
51  
52  
53  
54  
55  
56  
57  
58  
59  
60

# BMJ Open

## Consequences of early life exposure to the 1983-1985 Ethiopian Great Famine on cognitive function in adults: a historical cohort study

|                                 |                                                                                                                                                                                                                                                                                                                                                                                                                                                                                                                                                                                           |
|---------------------------------|-------------------------------------------------------------------------------------------------------------------------------------------------------------------------------------------------------------------------------------------------------------------------------------------------------------------------------------------------------------------------------------------------------------------------------------------------------------------------------------------------------------------------------------------------------------------------------------------|
| Journal:                        | <i>BMJ Open</i>                                                                                                                                                                                                                                                                                                                                                                                                                                                                                                                                                                           |
| Manuscript ID                   | bmjopen-2020-038977.R1                                                                                                                                                                                                                                                                                                                                                                                                                                                                                                                                                                    |
| Article Type:                   | Original research                                                                                                                                                                                                                                                                                                                                                                                                                                                                                                                                                                         |
| Date Submitted by the Author:   | 22-Jun-2020                                                                                                                                                                                                                                                                                                                                                                                                                                                                                                                                                                               |
| Complete List of Authors:       | Arage, Getachew;<br>Belachew, Tefera; Jimma University College of Public Health and Medical Sciences, Nutrition and Dietetics<br>Abera, Mubarek; Jimma University College of Public Health and Medical Sciences, Psychiatry<br>Abdulhay , Fedilu ; Jimma University College of Public Health and Medical Sciences, Obstetrics and Gynecology<br>Abdulahi, Misra; Jimma University College of Public Health and Medical Sciences, Department of Population and Family Health<br>Hassen , Kalkidan; Jimma University College of Public Health and Medical Sciences, Nutrition and Dietetics |
| <b>Primary Subject Heading</b>: | Nutrition and metabolism                                                                                                                                                                                                                                                                                                                                                                                                                                                                                                                                                                  |
| Secondary Subject Heading:      | Mental health                                                                                                                                                                                                                                                                                                                                                                                                                                                                                                                                                                             |
| Keywords:                       | Nutritional support < GASTROENTEROLOGY, Adult neurology < NEUROLOGY, NUTRITION & DIETETICS                                                                                                                                                                                                                                                                                                                                                                                                                                                                                                |
|                                 |                                                                                                                                                                                                                                                                                                                                                                                                                                                                                                                                                                                           |

SCHOLARONE™  
Manuscripts



I, the Submitting Author has the right to grant and does grant on behalf of all authors of the Work (as defined in the below author licence), an exclusive licence and/or a non-exclusive licence for contributions from authors who are: i) UK Crown employees; ii) where BMJ has agreed a CC-BY licence shall apply, and/or iii) in accordance with the terms applicable for US Federal Government officers or employees acting as part of their official duties; on a worldwide, perpetual, irrevocable, royalty-free basis to BMJ Publishing Group Ltd ("BMJ") its licensees and where the relevant Journal is co-owned by BMJ to the co-owners of the Journal, to publish the Work in this journal and any other BMJ products and to exploit all rights, as set out in our [licence](#).

The Submitting Author accepts and understands that any supply made under these terms is made by BMJ to the Submitting Author unless you are acting as an employee on behalf of your employer or a postgraduate student of an affiliated institution which is paying any applicable article publishing charge ("APC") for Open Access articles. Where the Submitting Author wishes to make the Work available on an Open Access basis (and intends to pay the relevant APC), the terms of reuse of such Open Access shall be governed by a Creative Commons licence – details of these licences and which [Creative Commons](#) licence will apply to this Work are set out in our licence referred to above.

Other than as permitted in any relevant BMJ Author's Self Archiving Policies, I confirm this Work has not been accepted for publication elsewhere, is not being considered for publication elsewhere and does not duplicate material already published. I confirm all authors consent to publication of this Work and authorise the granting of this licence.

1  
2  
3  
4 **Consequences of early life exposure to the 1983-1985 Ethiopian Great**  
5 **Famine on cognitive function in adults: a historical cohort study**  
6  
7

8  
9  
10 Getachew Arage<sup>1\*2</sup>, Tefera Belachew<sup>2</sup>, Mubarek Abera<sup>3</sup>, Fedilu Abdulhay<sup>4</sup>, Misra  
11 Abdulahi<sup>5</sup>, Kalkidan Hassen Abate<sup>1</sup>  
12  
13  
14  
15  
16  
17  
18  
19  
20  
21  
22  
23  
24  
25  
26  
27  
28  
29

30  
31 <sup>1\*</sup>Correspondence: Getachew Arage

32 Email: [getachewarage2004@gmail.com](mailto:getachewarage2004@gmail.com)  
33  
34  
35  
36  
37  
38  
39  
40  
41  
42  
43  
44  
45  
46  
47  
48  
49  
50  
51  
52  
53  
54  
55  
56  
57  
58  
59  
60

## Abstract

**Objectives:** To investigate the association between early life famine exposure and cognitive function in adults.

**Design:** Historical cohort study

**Setting:** Raya Kobo District, North Wollo Zone, Northeast Ethiopia.

**Participants:** We recruited 1047 adult men and women aged 30-38 years who had history of early life exposure to Ethiopian great famine. Based on self-reported age and birth date, participants were categorized into famine exposed in early life (prenatal/postnatal) and non-exposed groups.

**Outcome measures:** The primary outcome measure of this study was cognitive function in adults after early life exposure to famine. Cognitive function was measured using Montreal Cognitive Assessment (MCA)—basic. Associations between exposure and outcome variables were examined by linear regression analysis models.

**Results:** Adjusted for covariates, early life exposure to famine showed 1.29 ( $\beta = -1.29$ ; 95% CI: -2.16, -0.52) points lower cognitive function score compared to non-exposed. Based on sub-analysis for timing of famine exposure, postnatal exposure to famine resulted in 2.26 ( $\beta = -2.26$ ; 95% CI -3.12, -1.36) points lower cognitive function score compared to non-exposed groups. Prenatal famine exposure had 1.26 ( $\beta = -1.26$ ; 95% CI -2.35, 0.94) points lower cognitive function score although not statistically significant.

**Conclusions:** Famine exposure in early life was associated with cognitive functions in adults. While the overall findings highlight the importance of optimal nutrition in early life for brain growth and development, the association observed between postnatal famine exposure and adult cognitive function may indicate the relative importance of learning and experience during early childhood for optimal brain development after birth. Further studies are needed to elucidate the potential mechanism behind this association.

25

26

1  
2  
3 **27 Strengths and limitations of this study**  
4

- 5 28 ▪ This is the first study to examine the effect of early life famine exposure on adulthood  
6 cognitive function in low income country, Ethiopia.  
7  
8 30 ▪ To control for selection bias, a one year transitional (washout) period was considered.  
9  
10 31 ▪ Severity of exposure at individual level was not considered  
11  
12 32 ▪ Early childhood experiences, parent-child bond, and health status during early life  
13 didn't considered  
14  
15 34 ▪ Birth weight and maternal factors including behavioral risk factors, psychological  
16 stress and infection didn't not considered  
17  
18  
19  
20  
21  
22  
23  
24  
25  
26  
27  
28  
29  
30  
31  
32  
33  
34  
35



## 36 Introduction

37 Cognitive functions are a complex sets of higher mental activities controlled by the brain;  
38 and includes attention, memory, thinking, learning, and perception (1, 2). Rapid growth  
39 and development of the human brain (brain growth spurt) occurs during fetal and early  
40 postnatal (first 2 years of age) life. At birth, the brain already grown its 25% of adult size  
41 , and by the age of 2-3 years it grows 80% of its adult size (3, 4). As such the growth  
42 and subsequent functions of the brain can greatly be influenced by prenatal and postnatal  
43 environments such as malnutrition and other adverse life experiences (5). Nutrients are  
44 essentials for the formation of the building blocks of neurotransmitters, cell proliferation,  
45 deoxyribonucleic acid (DNA) synthesis, and enzyme in the brain (1). Malnutrition in the  
46 postnatal period affects child's ability to interact and explore with the environment which  
47 interferes with language, motor and social skills development; all of which are the  
48 foundation block for adult cognitive capacities (5, 6).

49 Currently the burden of neurological and mental health disorders are alarmingly  
50 increasing, particularly, with a higher pace in Sub-Saharan African countries (7, 8).

51 According to the 2016 Global Burden of Disease (GBD) report, neurological disorders  
52 were the leading cause of Disability-Adjusted Life Years (DALYs) (9). In Ethiopia  
53 high prevalence of cognitive impairment was observed among adults living with  
54 underlying medical disorders such as HIV/ AIDS, and diabetes mellitus (10-12).

55 Early scientists Barker and colleagues introduced a theory called "Fetal Origin of Adult  
56 Diseases (FOAD)" or "Developmental Origins of Health and Disease (DOHaD)" to  
57 explain the long term consequences of early life undernutrition on adult health and  
58 diseases such as cognitive function (13-15).

59 Famine study provides an opportunity to examine the association between early life  
60 nutrition and its long term effects on adult diseases including cognitive function. Previous  
61 famine studies have contributed substantial evidence on the association between famine  
62 exposure in early life and cognitive function in adults, and reported heterogeneous  
63 findings (16-20).

64 The 1983-1985 Ethiopian Great Famine was one of Africa's most severe famines that  
65 caused over half a million deaths (21, 22). It affects the whole Ethiopia and returns to  
66 normal year (but some problems in certain villages) during September 1986 – September  
67 1987 (21). Hence, we conducted this study to investigate the effects of early life exposure

68 to famine (prenatal and first 2 years of postnatal life) on cognitive function in adults  
69 among survivors of the Ethiopian Great famine in Wollo province, Ethiopia.

## 70 **Methods and Materials**

### 71 **Study setting and design**

72 The study setting has been described in detail elsewhere (23). Briefly, the study was  
73 conducted in Raya Kobo District, northeast Ethiopia, which was the epicenter for the  
74 1983-1985 Ethiopian great famine (21). A historical cohort study design was employed  
75 from March 15 to April 30, 2019.

### 77 **Study participants and sampling**

78 Adult men and women aged 30-38 years who had history of early life exposure to famine  
79 were the study participants. Self-reported age and birth date were used to categorize  
80 famine exposure status. The start and end dates of the famine was used to define windows  
81 for famine exposure (21). Thus, the study participants were categorized into two groups:  
82 Early life exposed, age from 34 to 38 years with birth date between September 8, 1981 to  
83 August 30, 1985; non-exposed, age from 30 to 32 years with birth date between  
84 September 8, 1987 to October 8, 1988. The early life famine exposed groups were further  
85 grouped into prenatally exposed, age from 34 to 36 years with birth date between August  
86 8, 1983 to August 30, 1985 and postnatal-exposed, age from 37 to 38 years with birth  
87 date between September 8, 1981 to August 8, 1983. In order to get optimal washout  
88 period between exposed and non-exposed groups, participants born immediately after end  
89 of the famine (between 8, September 1986 to 30, August 1987) were excluded from this  
90 study (**supplementary file1**). Additionally, adults who were displaced to other area of  
91 the country and those who were in other location during the famine and participants with  
92 deformity (Kyphosis, Scoliosis, and limb deformity) were excluded from the study.

93 Two population mean formula using G-Power 3.0.10 and taking type one error 5%, 80%  
94 power, a design effect of 1.5 and calculated effect size of 0.1817 was used to calculate  
95 the sample size. Assuming the mean ( $\pm$  SD) of general cognition score in exposed groups  
96 12.06 (3.50) and non-exposed groups 11.40 (3.76) from a study conducted in China (17),  
97 the total calculated sample size was 1071 (714 exposed and 357 non-exposed groups).  
98 We included 1047 (697 exposed and 350 non-exposed groups) participants who had a

99 complete data on all variables required in the analysis. Multistage stratified random  
100 sampling technique was used to select the study participants (**Figure 1**).

### 101 **Patient and public involvement**

102 There was no direct public or patient involvement in the design and implementation of  
103 this study.

### 104 **Data collections and measurement**

105 Pretested and structured questionnaire was used to collect socio-demographic/economic  
106 data and lifestyle factors of participants using face-to-face interview. The questionnaire was  
107 first prepared in English and then translated into Amharic (the local language) and back  
108 into English to ensure consistency. Eight trained clinical nurses collected the data.

### 109 **Main exposure variable**

110 The main exposure variable, early life (prenatal and first 2 years of post-natal life)  
111 exposure to the 1983-85 Ethiopian great famine was determined using the age and birth  
112 date of participants. We considered the participants is prenatal exposed (intrauterine life  
113 or born during the famine), postnatal exposed (first 2 years of age during the famine) and  
114 non-exposed (born after the famine).

### 115 **Outcome measure**

116 The primary outcome variable, cognitive function was measured using the Montreal  
117 Cognitive Assessment (MoCA)-basic. MoCA enables the assessment of different  
118 domains of cognitive function including perception, thinking, reasoning and memory. It  
119 has high reliability in individuals who are illiterate and have low-educational status (24).  
120 The cognitive function score for each item was added to get the total score; then the mean  
121 score was computed.

### 122 **Covariates**

123 Additionally, various sets of covariates including participants sex, age, educational status,  
124 marital status, residence, occupational status, wealth index, dietary pattern, substance use  
125 and physical activity were collected. We define household wealth index, substance use  
126 and physical activity similar to previous study (23). Dietary pattern was assessed using  
127 qualitative food frequency questionnaire (FFQ). Participants were asked to report the

1  
2  
3 128 frequency of consumption of each food per day, per week or per month using the past one  
4 129 year as a reference (25). Two major dietary patterns, healthy and unhealthy, were derived  
5  
6 130 through K-means cluster analysis. The detail for assessing dietary patterns has been  
7  
8 131 described as supplementary file (**Supplementary file 2**). History of raised blood pressure  
9  
10 132 and diabetes were assessed by interviewing adults. Body mass index (BMI) was  
11  
12 133 calculated as the weight in kilogram divided by height in meters squared ( $\text{kg}/\text{m}^2$ ). Blood  
13  
14 134 pressure was measured in triplicate using digital blood pressure measurement after 5  
15  
16 135 minutes of rest. Sex of the participants and residency were considered as potential effect  
17  
18 136 modifiers.

### 19 137 **Statistical Analysis**

20  
21 138 The data were doubly entered to Epidata 3.1 and exported to SPSS version 25 ([SPSS  
22  
23 139 Inc., Chicago, Illinois] for analysis. Percentages were used to described categorical  
24  
25 140 variables while mean and standard deviation ( $\pm$  SD) or medians and interquartile ranges  
26  
27 141 (IQR) were used to described continuous variables. Differences in mean cognitive  
28  
29 142 function score among different groups of early life was compared using one-way and two-  
30  
31 143 way analysis of variance (ANOVA) or T-test.

32  
33 144 A series of linear regression analyses with robust statistical procedures were conducted  
34  
35 145 to evaluate association between the three exposure categories (early life, prenatal or  
36  
37 146 postnatal exposure) and cognitive function in adults. The estimate ( $\beta$ -coefficients) and  
38  
39 147 95% CI were reported to describe the associations. Three sets of regression models were  
40  
41 148 developed. Model 1: included the outcome and the main exposure variable (famine  
42  
43 149 exposure status). Model 2: built on model one by adding sex, age, residence and  
44  
45 150 educational status. Model 3: full adjusted model built on model two by adding body  
46  
47 151 mass index, dietary pattern, increased blood pressure, physical activity, cigarette  
48  
49 152 smoking, alcohol drinking, history of hypertension, diabetes and effect modifiers. The  
50  
51 153 rationale of the different models was to observe changes in the association between the  
52  
53 154 main exposure and outcome variable when different sets of covariates were accounted in  
54  
55 155 the model. The outcome variable, cognitive function score was tested for normality using  
56  
57 156 a P-P plot and a steam leaf diagram, and all potential confounders were tested for linearity  
58  
59 157 with the outcome variable using scatter plots. Effect modification by sex and residence  
60  
158 were assessed by including interaction terms for both famines exposed groups. P-values

159 presented were based on two-tailed test and  $P < 0.05$  was considered statistically  
160 significant.

## 161 **Results**

### 162 **Background characteristics**

163 A total of 1047 participants (697 exposed and 350 non- exposed groups) were enrolled to  
164 the study. The mean ( $\pm$  SD) ages for early life exposed and non-exposed groups were  
165 36.30 ( $\pm$  1.5) and 31.2 ( $\pm$  0.6), respectively. Four-hundred-fifteen (59.5%) of the  
166 participants were females exposed to famine. Five-hundred-fifty-eight (80.1%) of the  
167 participants were rural residents exposed to famine. Three-hundred-three (43.5%) of them  
168 can't read and write among early life exposed groups (**Table 1**).

### 169 **Cognitive function**

170 The mean ( $\pm$  SD) cognitive function score among early life exposed and non-exposed  
171 groups were  $17.95 \pm 7.43$  and  $21.11 \pm 6.90$  respectively. Based on the time of exposure  
172 to famine, the mean cognitive function score for prenatal and postnatal exposed group  
173 was  $19.43 \pm 6.60$  and  $16.48 \pm 6.70$  respectively. Among early exposed groups, the mean  
174 cognitive test score was  $16.61 \pm 7.50$  for females and  $19.93 \pm 6.87$  for males whereas it  
175 was  $18.53 \pm 6.92$  for urban and  $15.65 \pm 8.84$  for rural residents (**Table 2**).

### 176 **Early life famine exposure and cognitive function in adults**

177 Multivariable linear regression analysis was used to detect the association between cognitive  
178 function and the famine exposure in early life (**Table 3**). After adjusted for the main exposure  
179 variable (Model 1), the cognitive function score in early life, prenatal and postnatal exposed  
180 groups were lowered by 3.16 ( $\beta = -3.16$ ; 95% CI: -4.09, -2.28), 1.68 ( $\beta = -1.68$ ; 95% CI: -  
181 2.74, -0.62) and 4.66 ( $\beta = -4.66$ ; 95% CI: -5.76, -3.55) points respectively compared to non-  
182 exposed groups. After adjusted for sex, age, residence and educational status (Model 2), the  
183 score of cognitive function was lowered by 1.12 ( $\beta = -1.12$ ; 95% CI: -1.89, -0.33), 1.27 ( $\beta = -$   
184 2.27; 95% CI: 2.27, -0.12) and 2.18 ( $\beta = -2.18$ ; 95% CI: -3.11, -1.27) points in early life,  
185 prenatal and post-natal exposed groups respectively. In the fully adjusted model (Model 3),  
186 early life exposure to famine showed 1.29 ( $\beta = -1.29$ ; 95% CI: -2.16, -0.52) points lower  
187 cognitive function score compared to non-exposed. Postnatal exposure resulted in 2.26 points

1  
2  
3 reduction ( $\beta = -2.26$ ; 95% CI: -3.12, -1.36) while prenatal exposure resulted in 1.26-point  
4  
5 reduction ( $\beta = -1.26$ ; 95% CI: -2.35, 0.94) in cognitive function scores although the later was  
6  
7 not statistically significant. The effect of famine exposure in early life was not modified by  
8  
9 sex and residency ( $P$  interaction  $> 0.05$ ) (results not shown).

10  
11 192

## 12 193 **Role of covariates**

13  
14 194 Different models were used to account for different sets of potential confounders. But, the  
15  
16 association between early life famine exposure and adulthood cognitive function  
17  
18 continued significant. The highest effect of famine exposure on low cognitive function  
19  
20 score ( $\beta = -3.16$ ; 95% CI (-4.09, -2.28) was observed in unadjusted regression model  
21  
22 (Table 3). Moreover, male sex and educational status of secondary and above were  
23  
24 positively associated cognitive function. Rural residency and unhealthy dietary pattern  
25  
26 was negatively associated with cognitive function in adults (Table 4).

## 27 201 **Discussion**

28  
29 202 The main goal of this study was to examine the association between early life famine  
30  
31 203 exposure and cognitive function in adults. The focus of this article is therefore to describe  
32  
33 204 the contributions of factors beyond early childhood experience and adult lifestyles, which  
34  
35 205 affects cognitive function of adults (2, 26, 27).

36  
37 206 When examining the association between famine exposure in early life with cognitive  
38  
39 207 function in adults using multivariable linear regression models, adults who had early life  
40  
41 208 exposure to famine were 1.29 points lowered cognitive function score. This association  
42  
43 209 might have been confounded by other predictors of cognitive function in adults. To  
44  
45 210 account for this, we adjusted for potential confounders. However, in all of these adjusted  
46  
47 211 models the observed association remained significant after adjustment for potential  
48  
49 212 confounders. A sub-analysis by timing of exposure, we found that adults who had prenatal  
50  
51 213 famine exposure resulted in 1.26 points lowered cognitive function score compared to  
52  
53 214 non-exposed though not statistically significant. Similarly, postnatal exposure to famine  
54  
55 215 had 2.26 points decreased cognitive function score after adjusted for all possible  
56  
57 216 covariates.



1  
2  
3 217 Our findings showed that early life exposure to famine negatively affected adult cognitive  
4 218 function. Although much is not known about the mechanisms how early life famine  
5 219 exposure affects cognitive function in adult life, this might be explained by the potential  
6 220 capacity of adverse life experience during early life that could have impaired the growth  
7 221 and development of the brain, which can affect cognitive function across the life span  
8 222 (28). In addition, epigenetic changes during early life is another potential mechanism  
9 223 that facilitated to understand the association between famine exposure in early life and  
10 224 the risk of altered cognitive function in adults (29, 30). In Barbados Nutrition Study, long  
11 225 lasting DNA methylation changes due to early childhood malnutrition was associated  
12 226 with liability for defective attention and cognition in adults (31).

13 227 The finding that postnatal exposure to famine, but not prenatal exposure was associated  
14 228 with cognitive function in adults can be discussed from the following three perspectives.  
15 229 Firstly, from the biological point of view, the first two years of postnatal life is a period  
16 230 of the fastest brain development compared to other periods, and accompanied by highest  
17 231 energy demands of the brain (3, 4, 32). The frontal lobe, which is the center for higher  
18 232 cognitive functions including planning, sequencing and self-regulation appears to occur  
19 233 in growth spurts during the first two years of life after birth (4). The study of Georgieff  
20 234 et al., (2006) reported that protein- energy malnutrition during the postnatal period  
21 235 resulted in smaller brain size related with fewer neurons, simpler synaptic connections  
22 236 and reduced concentration of neurotransmitters, and growth factors altogether contribute  
23 237 for poorer long term cognitive outcomes (33). Moreover, this might be due to the fact that  
24 238 nutrient supply to the brain might not be affected unlike other organs. As a result, under-  
25 239 nutrition during prenatal life couldn't have a profound effect on cognitive decline in  
26 240 adults (15).

27 241 Secondly, from the behavioral point of view, malnourishment during the first two years  
28 242 of life has been associated with immaturity of the brain likely due to lack of stimulus  
29 243 from deprived environments and lack of opportunity to play, communication and explore  
30 244 to their environment (6). Moreover, the mother could not have the capacity to actively  
31 245 engage their young children to play and communication as the mother themselves have  
32 246 affected by the famine. Thus, the lack of opportunity to get engaged and to explore the  
33 247 environment as a secondary complication of the malnutrition from famine might rather

1  
2  
3 248 explain the lower cognitive function in adulthood. Impaired exploratory behavior and  
4 249 motor development can further compromise and potentiate early damage of the brain (34).  
5  
6 250 Thirdly, those children who experienced famine in their postnatal life could have higher  
7  
8 251 risk of stunting. Studies show that stunting in early life is associated with poor cognitive  
9  
10 252 function in later life (35, 36). Furthermore, the implication of sever famine like Ethiopian  
11  
12 253 great famine affects children in early life is not only related with insufficient foods. It also  
13  
14 254 affects the quality of parent-child bond, social development and a child's ability to  
15  
16 255 interact with the environment, which determine cognitive function in the long run (2, 4,  
17 256 21).

18 257 In this study, we observed that the scores on the Montreal Cognitive Assessment are all  
19  
20 258 below standard cut off scores, even in the unexposed group. Therefore, it is important to  
21  
22 259 notice different factors responsible for lower score in the overall population. Ethiopia is  
23  
24 260 known by high burden of stunting among children (37). The ability to get adequate  
25  
26 261 nutrition is the commonest problem in Ethiopia. Consequently, early childhood stunting  
27  
28 262 is negatively associated with cognitive function in adults (35, 36). Moreover, factors such  
29  
30 263 as parental schooling, wealth, size at birth, duration of breast feeding, health problems of  
31  
32 264 early childhood (diarrhea, malaria, acute respiratory illness, malaria) have impact on  
33  
34 265 cognitive function in later life. All of which could have affected the outcome among the  
35  
36 266 overall populations (2, 38).

37 267 The observed association between early life famine exposure and cognitive function in  
38  
39 268 adults was consistent with studies conducted in the Chinese famine exposed birth cohorts  
40  
41 269 of the year 1959–1961 (16, 17, 20), Dutch famine (19) and Ghana famine (39). The study  
42  
43 270 participants during the Chinese, Ghana and Ethiopian famine were selected from the  
44  
45 271 settings known for chronic malnutrition. The finding that prenatal exposure to famine was  
46  
47 272 not associated with cognitive function is consistent with other Dutch famine study (40)  
48  
49 273 and Hertfordshire follow up study (41). Nonetheless, our finding is inconsistent with  
50  
51 274 other Chines famine study (18). These variations could be explained by the heterogeneity  
52  
53 275 of test tools. Comprehensive neuropsychological tests, containing the Telephone  
54  
55 276 Interview of Cognitive Status (TICS-10), word recall, and pentagon drawing was used to  
56  
57 277 estimate cognitive performance in Chinese study (18), as Montreal Cognitive Assessment  
58  
59 278 was used in Ethiopian study.



1  
2  
3 279 The presents study finding has implications for the global rise of neurodevelopmental  
4 280 problems. It adds for understanding of the links between early life and later health, and  
5 281 examines the role of nutrition in utero and postnatal life in the etiology of decreasing  
6 282 cognitive function in later life More remarkably, these findings are used to plan effective  
7 283 ways of improving cognitive function of adults in Ethiopia, a country known for high  
8 284 prevalence of malnourishment during early life (37). Additionally, these findings may  
9 285 help policy makers to establish context specific strategies particular to famine prone  
10 286 regions of the country.

11 287 There are several limitations of our study. First, the findings might be partly biased by  
12 288 survival bias. It is plausible that potential participants couldn't participate because of  
13 289 health related problems, and others may have already died due to the exposure. Second,  
14 290 exposure to the famine was defined using the self-reported birth date and age, thus recall  
15 291 bias cannot be ruled out. However, it is at our utmost belief that the exceptional  
16 292 catastrophic period of the famine, named as "Kefu Qan" in the memory of the survivors  
17 293 and the world could not be forgettable. Third, severity of exposure at individual level was  
18 294 not considered although the long-term consequence of famine depends on the severity of  
19 295 the exposure within the household. Fourth, the study didn't capture early childhood  
20 296 experiences such as parent-child bond, parenting style and neonatal problems such as  
21 297 asphyxia, hypoglycemia, hypothermia, preterm, which causes brain damage and  
22 298 predispose to reduced cognitive function in later life. Finally, reduced in cognitive  
23 299 function could be worsening with age. However, the prolonged Ethiopian great famine  
24 300 affected almost the whole Ethiopia (21), making it impossible to identify a control group  
25 301 that was not affected by famine. To overcome this limitation, age adjustment was  
26 302 conducted in the multivariate model. Despite all these limitations, our study is the first to  
27 303 investigate long-term consequences of early life exposure to famine in the context of low  
28 304 income countries like Ethiopia.

29 305 In conclusion, famine exposure during early life was positively associated with cognitive  
30 306 function in adults. More specifically, postnatal famine exposure was associated with  
31 307 decreased cognitive function. Although there was no statistically significant association  
32 308 between prenatal exposure to famine and cognitive function in adults, a decrease in  
33 309 cognitive test score was observed. The study will potentially lead to better nutritional  
34 310 interventions during intrauterine period and the first two years of postnatal life. The

311 mechanism through which famine exposure during early life influenced adult cognitive  
312 function needs additional study in a similar context.

313

#### 314 **Author affiliations**

315 <sup>1\*</sup>Department of Nutrition and Dietetics, College of Health Sciences, DebreTabor  
316 University, Debre Tabor, Ethiopia

317 <sup>1,2</sup>Department of Nutrition and Dietetics, Institute of Health, Jimma University, Jimma,  
318 Ethiopia

319 <sup>3</sup>Department of Psychiatry, Faculty of Medical Sciences, Jimma University, Jimma,  
320 Ethiopia

321 <sup>4</sup>Department of Obstetrics and Gynecology, Faculty of Medical Sciences, Jimma  
322 University, Jimma, Ethiopia

323 <sup>5</sup>Department of Population and Family Health, Institute of Health, Jimma University,  
324 Jimma, Ethiopia

325 **Acknowledgements** The authors would like to acknowledge the Institute of Health,  
326 Jimma University for funding the study. The authors are also grateful to the study  
327 participants for their dedicated time and volunteer participation

328 **Contributorship** Getachew Arage (GA), Kalkidan Hassen Abate (KHA), and Mubarek  
329 Abera (MA) conceived and planned the study. GA implemented and supervised the field  
330 work. Fedilu Abdulhay (FA) and Misra Abdulahi (MAB) were involved in data cleaning  
331 and verification. GA, KHA and MA did the analysis and interpretation. GA, FA and MAB  
332 drafted the manuscript. MA, KHA, Tefera Belachew (TB) and MAB critically revised the  
333 manuscript. All authors have reviewed the manuscript and approved the final version for  
334 submission.

335 **Funding** The study was funded by Jimma University, Institute of Health. The funder has  
336 no role in the design, implementation, analysis, and in the interpretation and write up of  
337 the findings

338 **Competing interests** None declared.

339 **Ethics approval** Ethical approval was obtained from Institutional Review Board of  
340 Jimma University (Ref. No. JHRPGD/660/2019).

341 **Data sharing statement** Extra data is available from the corresponding author on request.

## References

1. Bhatnagar S, Taneja S. Zinc and cognitive development. *British journal of nutrition*. 2001;85(S2):S139-S45.
2. Richards M, Shipley B, Fuhrer R, Wadsworth ME. Cognitive ability in childhood and cognitive decline in mid-life: longitudinal birth cohort study. *Bmj*. 2004;328(7439):552.
3. BNF. *Nutrition and Development: Short and Long Term Consequences for Health*. Task Force Report. 2013.
4. Bryan J, Osendarp S, Hughes D, Calvaresi E, Baghurst K, van Klinken J-W. Nutrients for cognitive development in school-aged children. *Nutrition reviews*. 2004;62(8):295-306.
5. Georgieff MK. Nutrition and the developing brain: nutrient priorities and measurement. *The American journal of clinical nutrition*. 2007;85(2):614S-20S.
6. Fox SE, Levitt P, Nelson III CA. How the timing and quality of early experiences influence the development of brain architecture. *Child development*. 2010;81(1):28-40.
7. Chisholm D, Heslin M, Docrat S, Nanda S, Shidhaye R, Upadhaya N, et al. Scaling-up services for psychosis, depression and epilepsy in sub-Saharan Africa and South Asia: development and application of a mental health systems planning tool (OneHealth). *Epidemiology and Psychiatric Sciences*. 2017;26(3):234-44.
8. Whiteford HA, Ferrari AJ, Degenhardt L, Feigin V, Vos T. Global burden of mental, neurological, and substance use disorders: an analysis from the Global Burden of Disease Study 2010. *Mental, Neurological, and Substance Use Disorders*. 2015:29.
9. Naghavi M. Global, regional, and national burden of suicide mortality 1990 to 2016: systematic analysis for the Global Burden of Disease Study 2016. *bmj*. 2019;364:l94.
10. Mulugeta T, Dessalegn M, Behailu S. COGNITIVE IMPAIRMENT AMONG TYPE 2 DIABETES MELLITUS PATIENTS IN ETHIOPIA.
11. Dagneb B, Wolide AD, Mossie A. Cognitive impairment among type 2 diabetes mellitus patients at Jimma University Specialized Hospital, Southwest Ethiopia. 2017.
12. Animut MD, Sorrie MB, Birhanu YW, Teshale MY. High prevalence of neurocognitive disorders observed among adult people living with HIV/AIDS in Southern Ethiopia: A cross-sectional study. *PloS one*. 2019;14(3).

13. Barker DJP. The developmental origins of adult disease. *Journal of the American College of Nutrition*. 2004;23(sup6):588S-95S.
14. Schlotz W, Phillips DI. Fetal origins of mental health: evidence and mechanisms. *Brain, behavior, and immunity*. 2009;23(7):905-16.
15. Gluckman PD, Hanson MA, Cooper C, Thornburg KL. Effect of in utero and early-life conditions on adult health and disease. *New England Journal of Medicine*. 2008;359(1):61-73.
16. Wang C, An Y, Yu H, Feng L, Liu Q, Lu Y, et al. Association between exposure to the Chinese famine in different stages of early life and decline in cognitive functioning in adulthood. *Frontiers in Behavioral Neuroscience*. 2016;10:146.
17. Xu H, Zhang Z, Li L, Liu J. Early life exposure to China's 1959–61 famine and midlife cognition. *International journal of epidemiology*. 2018;47(1):109-20.
18. Rong H, Lai X, Mahmoudi E, Fang H. Early-Life Exposure to the Chinese Famine and Risk of Cognitive Decline. *Journal of clinical medicine*. 2019;8(4):484.
19. De Rooij SR, Wouters H, Yonker JE, Painter RC, Roseboom TJ. Prenatal undernutrition and cognitive function in late adulthood. *Proceedings of the National Academy of Sciences*. 2010;107(39):16881-6.
20. Rong H, Xi Y, An Y, Tao L, Zhang X, Yu H, et al. The correlation between early stages of life exposed to Chinese famine and cognitive decline in adulthood: nutrition of adulthood plays an important role in the link? *Frontiers in aging neuroscience*. 2018;9:444.
21. Dercon S, Porter C. Live aid revisited: long-term impacts of the 1984 Ethiopian famine on children. *Journal of the European Economic Association*. 2014;12(4):927-48.
22. Rahmato D. Famine and survival strategies: a case study from Northeast Ethiopia: Nordic Africa Institute; 1991.
23. Arage G, Belachew T, Hassen H, Abera M, Abdulhay F, Abdulahi M, et al. Effects of prenatal exposure to the 1983-1985 Ethiopian Great Famine on metabolic syndrome in adults: a historical cohort study. *British Journal of Nutrition*. 2020:1-27.
24. Julayanont P, Tangwongchai S, Hemrungron S, Tunvirachaisakul C, Phanthumchinda K, Hongswat J, et al. The montreal cognitive assessment—basic: a screening tool for mild cognitive impairment in illiterate and low-educated elderly adults. *Journal of the American Geriatrics Society*. 2015;63(12):2550-4.

25. Rodríguez MM, Méndez H, Torún B, Schroeder D, Stein AD. Validation of a semi-quantitative food-frequency questionnaire for use among adults in Guatemala. *Public health nutrition*. 2002;5(5):691-8.
26. Lee LK, Shahar S, Chin A-V, Yusoff NAM, Rajab N, Aziz SA. Prevalence of gender disparities and predictors affecting the occurrence of mild cognitive impairment (MCI). *Archives of gerontology and geriatrics*. 2012;54(1):185-91.
27. Zhang N, Yang Y, Wang A, Cao Y, Li J, Yang Y, et al. Association of ideal cardiovascular health metrics and cognitive functioning: the APAC study. *European journal of neurology*. 2016;23(9):1447-54.
28. Kretchmer N, Beard JL, Carlson S. The role of nutrition in the development of normal cognition. *The American journal of clinical nutrition*. 1996;63(6):997S-1001S.
29. Meaney MJ, Szyf M, Seckl JR. Epigenetic mechanisms of perinatal programming of hypothalamic-pituitary-adrenal function and health. *Trends in molecular medicine*. 2007;13(7):269-77.
30. Lagali P, Corcoran C, Picketts D. Hippocampus development and function: role of epigenetic factors and implications for cognitive disease. *Clinical genetics*. 2010;78(4):321-33.
31. Peter CJ, Fischer LK, Kundakovic M, Garg P, Jakovcevski M, Dincer A, et al. DNA Methylation Signatures of Early Childhood Malnutrition Associated With Impairments in Attention and Cognition. *Biological psychiatry*. 2016;80(10):765-74.
32. Sgarbieri VC, Pacheco MTB. Human development: from conception to maturity. *Brazilian Journal of Food Technology*. 2017;20.
33. Georgieff MK. Early brain growth: macronutrients for the developing brain. *NeoReviews*. 2006;7(7):e334-e43.
34. Walker SP, Wachs TD, Gardner JM, Lozoff B, Wasserman GA, Pollitt E, et al. Child development: risk factors for adverse outcomes in developing countries. *The lancet*. 2007;369(9556):145-57.
35. Berkman DS, Lescano AG, Gilman RH, Lopez SL, Black MM. Effects of stunting, diarrhoeal disease, and parasitic infection during infancy on cognition in late childhood: a follow-up study. *The Lancet*. 2002;359(9306):564-71.

- 1  
2  
3 36. Crookston BT, Dearden KA, Alder SC, Porucznik CA, Stanford JB, Merrill RM, et  
4 al. Impact of early and concurrent stunting on cognition. *Maternal & Child Nutrition*.  
5 2011;7(4):397-409.  
6  
7 37. Megabiaw B, Rahman A. Prevalence and determinants of chronic malnutrition among  
8 under-5 children in Ethiopia. *International Journal of Child Health and Nutrition*.  
9 2013;2(3):230-6.  
10  
11 38. Everson-Rose SA, Mendes de Leon CF, Bienias JL, Wilson RS, Evans DA. Early life  
12 conditions and cognitive functioning in later life. *American journal of epidemiology*.  
13 2003;158(11):1083-9.  
14  
15 39. Ampaabeng SK, Tan CM. The long-term cognitive consequences of early childhood  
16 malnutrition: the case of famine in Ghana. *Journal of health economics*. 2013;32(6):1013-  
17 27.  
18  
19 40. de Groot RH, Stein AD, Jolles J, van Boxtel MP, Blauw G-J, Van de Bor M, et al.  
20 Prenatal famine exposure and cognition at age 59 years. *International Journal of*  
21 *Epidemiology*. 2011;40(2):327-37.  
22  
23 41. Martyn CN, Gale CR, Sayer AA, Fall C. Growth in utero and cognitive function in  
24 adult life: follow up study of people born between 1920 and 1943. *Bmj*.  
25 1996;312(7043):1393-6.  
26  
27  
28  
29  
30  
31  
32  
33  
34  
35  
36  
37  
38  
39  
40  
41  
42  
43  
44  
45  
46  
47  
48  
49  
50  
51  
52  
53  
54  
55  
56  
57  
58  
59  
60

## List of tables

| <b>Table 2:</b> Distribution of cognitive test score by famine exposure status, sex of participant and residency, Northeast Ethiopia, 2019 (n= 1047) |                                 |                  |                   |              |         |
|------------------------------------------------------------------------------------------------------------------------------------------------------|---------------------------------|------------------|-------------------|--------------|---------|
| Variables                                                                                                                                            | Early life exposed <sup>§</sup> | Prenatal exposed | Postnatal exposed | Non-exposed  | P-value |
| Cognitive test score,                                                                                                                                | 17.95 ± 7.43                    | 19.43 ± 6.60     | 16.48 ± 6.70      | 21.11 ± 6.90 | < 0.001 |

  

| <b>Table 1:</b> Background characteristics of the study participants according to Ethiopian famine exposure status, Northeast Ethiopia, 2019 (n= 1047) |                                            |                                   |                             |                               |          |
|--------------------------------------------------------------------------------------------------------------------------------------------------------|--------------------------------------------|-----------------------------------|-----------------------------|-------------------------------|----------|
| Variables                                                                                                                                              | Early life exposed <sup>§</sup><br>n = 697 | Prenatal exposed group<br>n = 348 | Postnatal exposed<br>n= 349 | Non- exposed group<br>n = 350 | P- value |
| Age, (years), mean ± SD                                                                                                                                | 36.3 ± 1.5                                 | 35.05 ± 0.8                       | 37.62 ± 0.5                 | 31.20 ± 0.6                   | < 0.001* |
| Sex, n (%)                                                                                                                                             |                                            |                                   |                             |                               |          |
| Female                                                                                                                                                 | 415 (59.5%)                                | 205 (58.9%)                       | 210 (60.2%)                 | 169 (48.3%)                   | 0.002*   |
| Male                                                                                                                                                   | 282 (40.5%)                                | 143 (41.1%)                       | 139 (39.8%)                 | 181 (51.7%)                   |          |
| Residence, n (%)                                                                                                                                       |                                            |                                   |                             |                               |          |
| Urban                                                                                                                                                  | 139 (19.9%)                                | 70 (20.1%)                        | 69 (19.7%)                  | 53 (15.2%)                    | 0.165    |
| Rural                                                                                                                                                  | 558 (80.1%)                                | 278 (79.8%)                       | 280 (80.3%)                 | 297 (84.8%)                   |          |
| Educational status                                                                                                                                     |                                            |                                   |                             |                               |          |
| Cannot read and write                                                                                                                                  | 303 (43.5%)                                | 138 (39.6%)                       | 165 (47.3%)                 | 87 (24.8%)                    |          |
| Primary school                                                                                                                                         | 170 (24.4%)                                | 86 (24.7%)                        | 84 (24.1%)                  | 66 (18.8%)                    |          |
| Secondary school                                                                                                                                       | 129 (18.5%)                                | 72 (20.7%)                        | 57 (16.3%)                  | 116 (33.2%)                   | < 0.001* |
| Secondary and above                                                                                                                                    | 95 (13.6%)                                 | 52 (14.9%)                        | 43 (12.3%)                  | 81 (23.2%)                    |          |
| Household wealth index, n (%)                                                                                                                          |                                            |                                   |                             |                               |          |
| Low                                                                                                                                                    | 184 (26.4%)                                | 76 (21.8%)                        | 108 (30.9%)                 | 70 (20.0%)                    |          |
| Medium                                                                                                                                                 | 103 (14.7%)                                | 55 (15.8%)                        | 48 (13.7%)                  | 58 (16.6%)                    | 0.011*   |
| High                                                                                                                                                   | 410 (58.8%)                                | 217 (62.4%)                       | 193 (55.4%)                 | 222 (63.4%)                   |          |
| Marital status , n (%)                                                                                                                                 |                                            |                                   |                             |                               |          |
| Single                                                                                                                                                 | 113 (15.5%)                                | 54 (15.5%)                        | 59 (16.9%)                  | 102 (29.2%)                   |          |
| Married                                                                                                                                                | 468 (67.2%)                                | 230 (66.1%)                       | 238 (68.2%)                 | 220 (62.8%)                   | < 0.001* |
| Divorced/Widowed                                                                                                                                       | 116 (17.4%)                                | 64 (18.4%)                        | 52 (14.8%)                  | 28 (8.0%)                     |          |
| Current drinker, n (%)                                                                                                                                 |                                            |                                   |                             |                               |          |
| Yes                                                                                                                                                    | 384 (55.1%)                                | 220 (63.2%)                       | 164 (46.9%)                 | 237 (67.7%)                   |          |
| No                                                                                                                                                     | 313 (44.9%)                                | 128 (36.8%)                       | 185 (53.1%)                 | 113 (32.3%)                   | 0.001*   |
| Dietary pattern, n (%)                                                                                                                                 |                                            |                                   |                             |                               |          |
| Healthy                                                                                                                                                | 202 (28.9%)                                | 113 (32.4%)                       | 89 (25.5%)                  | 125 (35.7%)                   |          |
| Unhealthy                                                                                                                                              | 495 (71.1%)                                | 235 (67.5%)                       | 260 (74.5%)                 | 225 (64.2%)                   | 0.012*   |
| Physical activity level, n (%)                                                                                                                         |                                            |                                   |                             |                               |          |
| Low                                                                                                                                                    | 55 (7.8%)                                  | 4 (1.2%)                          | 51 (14.6%)                  | 6 (1.7%)                      |          |
| Moderate                                                                                                                                               | 117 (16.8%)                                | 40 (11.5%)                        | 77 (22.1%)                  | 28 (8.0%)                     | < 0.001* |
| High                                                                                                                                                   | 525 (75.4%)                                | 304 (87.3%)                       | 221 (63.3%)                 | 316 (90.3%)                   |          |
| BMI (kg/m <sup>2</sup> ), mean ± SD                                                                                                                    | 23.3 ± 4.9                                 | 23.06 ± 5.21                      | 23.36 ± 4.60                | 23.3 ± 4.83                   | 0.025*   |
| History of Diabetes mellitus                                                                                                                           |                                            |                                   |                             |                               |          |
| Yes                                                                                                                                                    | 115 (16.5%)                                | 15 (4.3%)                         | 100 (28.6%)                 | 14 (4.0%)                     |          |
| No                                                                                                                                                     | 582 (83.5%)                                | 333 (95.6%)                       | 249 (71.4%)                 | 336 (96.0%)                   | < 0.001* |

<sup>§</sup> Prenatal and postnatal exposed, P-value—represents Independent Samples t-tests for continuous variables or  $\chi^2$ -test for categorical variables, \* Statistical significance



| mean $\pm$ SD                                                                                                              |                  |                   |                  |                  |       |
|----------------------------------------------------------------------------------------------------------------------------|------------------|-------------------|------------------|------------------|-------|
| Sex                                                                                                                        |                  |                   |                  |                  |       |
| Female                                                                                                                     | 16.61 $\pm$ 7.50 | 18.70. $\pm$ 6.42 | 14.53 $\pm$ 7.94 | 18.37 $\pm$ 7.24 | 0.031 |
| Male                                                                                                                       | 19.93 $\pm$ 6.87 | 20.48. $\pm$ 6.74 | 19.36 $\pm$ 7.02 | 23.67 $\pm$ 5.41 |       |
| Residence                                                                                                                  |                  |                   |                  |                  |       |
| Urban                                                                                                                      | 18.53 $\pm$ 6.92 | 19.48 $\pm$ 6.62  | 17.57 $\pm$ 7.12 | 21.47 $\pm$ 6.81 | 0.673 |
| Rural                                                                                                                      | 15.65 $\pm$ 8.84 | 19.24 $\pm$ 6.53  | 11.90 $\pm$ 9.43 | 19.13 $\pm$ 6.79 |       |
| § Prenatal and postnatal exposed, P-value—represents Independent Samples t-tests or Two-way ANOVA for continuous variables |                  |                   |                  |                  |       |

**Table 3:** Associations between early life famine exposure and cognitive function in adults, North Wollo Zone, Raya Kobo district, Northeast Ethiopia, 2019.

| Models  | Early life exposed <sup>§</sup> | Prenatal exposed     | postnatal exposed    | Non-exposed |
|---------|---------------------------------|----------------------|----------------------|-------------|
| Model 1 | -3.16 (-4.09, -2.28)            | -1.68 (-2.74, -0.62) | -4.66 (-5.76, -3.55) | Ref.        |



**Table 4:** Multivariable linear regression model predicting cognitive function of adults in North Wollo Zone, Raya Kobo district, Northeast Ethiopia, 2019.

| Variables                         | Early life exposed   | Non-exposed          | P-value              |      |
|-----------------------------------|----------------------|----------------------|----------------------|------|
| Sex of participants (male)        | 2.75 (1.83, 3.67)    | Ref.                 | < 0.001              |      |
| Place of residence (rural)        | -1.57 (-2.75, -0.38) | Ref.                 | 0.010                |      |
| Educational status (Secondary and | 3.15 (2.69, 3.61)    | Ref.                 | < 0.001              |      |
| R <sup>2</sup> (adjusted)         | 0.04                 | 0.02                 | 0.08                 | Ref. |
| Model 2                           | -1.12 (-1.89, -0.33) | -1.27 (-2.27, -0.12) | -2.18 (-3.11, -1.27) | Ref. |
| R <sup>2</sup> (adjusted)         | 0.36                 | 0.35                 | 0.42                 | Ref. |
| Model 3                           | -1.29 (-2.16, -0.52) | -1.26 (-2.35, 0.94)  | -2.26 (-3.12, -1.36) | Ref. |
| R <sup>2</sup> (adjusted)         | 0.37                 | 0.36                 | 0.45                 | Ref. |

§ Prenatal and postnatal exposed, Ref—Reference

Data are  $\beta$ -coefficients (95% confidence interval) from multiple linear regression analysis

All  $\beta$ -coefficients are related to the non-exposed groups

Model 1: Cognitive test score with famine exposure (unadjusted for any covariate)

Model 2: adjusted for sex, age, residence and educational status

Model 3: Adjusted for body mass index, dietary pattern, increased blood pressure, physical activity, cigarette smoking, alcohol drinking, history of chronic diseases and effect modifiers

1  
2  
3 above)

|                                                  |                       |      |         |
|--------------------------------------------------|-----------------------|------|---------|
| 4 Dietary pattern (unhealthy)                    | -1.84 (-2.80, -0.88)  | Ref. | < 0.001 |
| 5 History of diabetes mellitus                   | -1.13 (-2.47, -0.204) | Ref. | 0.09    |
| 6 Adjusted R <sup>2</sup> = 0.45, Ref—Reference, |                       |      |         |

7  
8  
9  
10  
11  
12  
13  
14  
15  
16  
17  
18  
19  
20

### 21 Figure legends

22 **Figure 1.** Flow diagram representing sample recruitment.  
23  
24  
25  
26  
27  
28  
29  
30  
31  
32  
33  
34  
35  
36  
37  
38  
39  
40  
41  
42  
43  
44  
45  
46  
47  
48  
49  
50  
51  
52  
53  
54  
55  
56  
57  
58  
59  
60

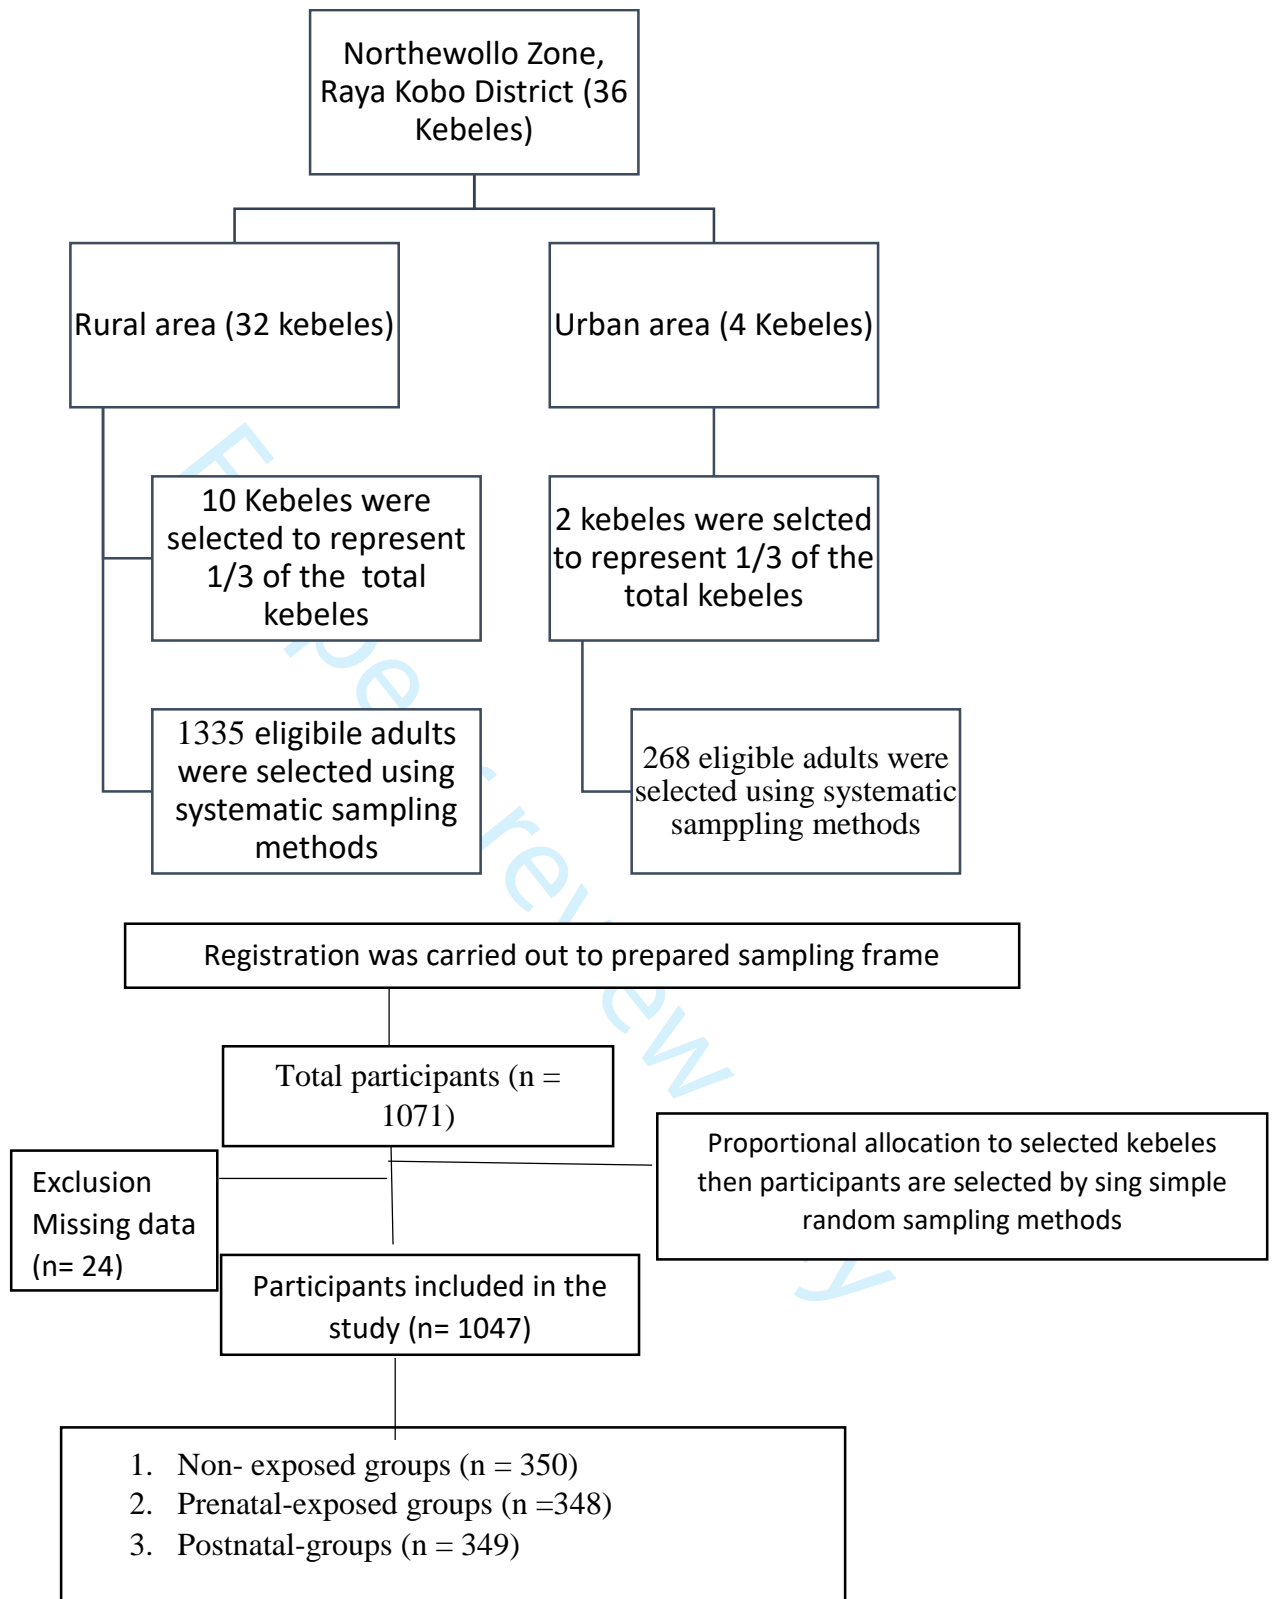

**Figure 1.** Flow diagram representing sample recruitment.

Window of exposure to the 1983-1985 Ethiopian Great Famine cohorts, North Wollo Zone, 2019.

| <b>Date of birth<br/>(dd/mm/yyyy)</b>                                   | <b>Exposure to the<br/>famine (August<br/>1983, August<br/>1985)</b> | <b>Age during the famine</b>                | <b>Age in<br/>2019<br/>(Current<br/>age)</b> |
|-------------------------------------------------------------------------|----------------------------------------------------------------------|---------------------------------------------|----------------------------------------------|
| <b>During famine</b><br>08/August/1983-<br>30/August /1985<br>(n=348)   | Prenatal exposed                                                     | Famine exposure during the<br>famine period | 34-36                                        |
| <b>Post-famine</b><br>08/September/1986-<br>30/August/1987              | Transition<br>(Washout period)                                       | One years after the famine                  | 33                                           |
| <b>Pre-famine</b><br>08/September/1981-<br>08/August/1983<br>(n=349)    | Postnatal exposed                                                    | Birth-two years during the<br>famine        | 37-38                                        |
| <b>Post-famine</b><br>08/September/1987-<br>08/October/1988<br>(n= 350) | Non- exposed<br>(reference group)                                    | Two years after the famine                  | 30-32                                        |
| <b>Total sample size</b>                                                |                                                                      | 1047                                        |                                              |

*Dd: days, mm: months, yy: years*

## Dietary assessment

Dietary pattern was assessed using qualitative food frequency questionnaire (FFQ) composed of 38 food items covering the main foods consumed in the study area (Aragie and Genanu, 2017, Selinus, 1971). Furthermore, the lists of food items were developed based on an extensive interview of the key informants who know the culture and the types of foods consumed in the study area. Participants were asked to report the frequency of consumption of each food per day, per week or per month using the past one year as a reference (Rodríguez et al., 2002). The consumption of each food item per day was not taken as a cut-off point to define consumers because of the large variation of dietary habit in the community over the days of the week. Rather, adults were coded as a “consumer” of a food item if they had consumed the food item at least once per week. As there is no Ethiopian classification of food groups, the 38 food items were grouped into six groups [cereals, vegetables and fruits, dairy products, protein foods, oils, others] according to the) FAO food groups (Assessment, 2018).

Means ( $\pm$  SD) intake of food groups per week in any given week during the last one year before the survey by famine exposure status, North Wollo Zone, Raya Kobo district, Northeast Ethiopia, 2019.

| Food groups                                 | Early life exposed <sup>§</sup> | Prenatal exposed | postnatal exposed | Non-exposed     |
|---------------------------------------------|---------------------------------|------------------|-------------------|-----------------|
| Cereals                                     | 1.00 $\pm$ 0.09                 | 1.00 $\pm$ 0.03  | 1.00 $\pm$ 0.00   | 1.00 $\pm$ 0.9  |
| Vegetables and fruits                       | 0.19 $\pm$ 0.40                 | 0.17 $\pm$ 0.05  | 0.39 $\pm$ 0.70   | 0.48 $\pm$ 0.65 |
| Protein source food (both plant and animal) | 0.18 $\pm$ 0.01                 | 0.19 $\pm$ 0.60  | 0.20 $\pm$ 0.08   | 0.36 $\pm$ 0.60 |
| Oils                                        | 0.80 $\pm$ 0.50                 | 0.89 $\pm$ 0.60  | 0.50 $\pm$ 0.03   | 1.00 $\pm$ 0.15 |
| Others*                                     | 0.92 $\pm$ 0.52                 | 1.00 $\pm$ 4.9   | 0.70 $\pm$ 0.30   | 1.00 $\pm$ 0.89 |

<sup>§</sup> Prenatal and postnatal exposed

T-test was done to assess the differences between famine exposed and non-exposed groups by intake of the different food groups. The food items were grouped according to Food and Agricultural organization (FAO). Means ( $\pm$  SD) indicates the frequency of consumption of the different food groups per week between food famine exposed and non-exposed groups

\* spices, condiments, beverages

ARAGIE, T. & GENANU, S. 2017. Level and Determinants of Food Security in North Wollo Zone (Amhara Region–Ethiopia). *Journal of Food Security*, 5, 232-247.

- 1  
2  
3 ASSESSMENT, D. 2018. A resource guide to method selection and application in low resource settings.  
4 *FAO: Rome, Italy.*
- 5 RODRÍGUEZ, M. M., MÉNDEZ, H., TORÚN, B., SCHROEDER, D. & STEIN, A. D. 2002. Validation of a semi-  
6 quantitative food-frequency questionnaire for use among adults in Guatemala. *Public health*  
7 *nutrition, 5, 691-698.*
- 8 SELINUS, R. 1971. The traditional foods in the central Ethiopian highlands.  
9  
10  
11  
12  
13  
14  
15  
16  
17  
18  
19  
20  
21  
22  
23  
24  
25  
26  
27  
28  
29  
30  
31  
32  
33  
34  
35  
36  
37  
38  
39  
40  
41  
42  
43  
44  
45  
46  
47  
48  
49  
50  
51  
52  
53  
54  
55  
56  
57  
58  
59  
60

## STROBE (Strengthening The Reporting of OBServational Studies in Epidemiology) Checklist

A checklist of items that should be included in reports of observational studies. You must report the page number in your manuscript where you consider each of the items listed in this checklist. If you have not included this information, either revise your manuscript accordingly before submitting or note N/A.

**Note:** An Explanation and Elaboration article discusses each checklist item and gives methodological background and published examples of transparent reporting. The STROBE checklist is best used in conjunction with this article (freely available on the Web sites of PLoS Medicine at <http://www.plosmedicine.org/>, Annals of Internal Medicine at <http://www.annals.org/>, and Epidemiology at <http://www.epidem.com/>). Information on the STROBE Initiative is available at [www.strobe-statement.org](http://www.strobe-statement.org).

| Section and Item     | Item No. | Recommendation                                                                                                                                                                             | Reported on Page No. |
|----------------------|----------|--------------------------------------------------------------------------------------------------------------------------------------------------------------------------------------------|----------------------|
| Title and Abstract   | 1        | (a) Indicate the study's design with a commonly used term in the title or the abstract                                                                                                     | 1                    |
|                      |          | (b) Provide in the abstract an informative and balanced summary of what was done and what was found                                                                                        | 2                    |
| <b>Introduction</b>  |          |                                                                                                                                                                                            |                      |
| Background/Rationale | 2        | Explain the scientific background and rationale for the investigation being reported                                                                                                       | 4                    |
| Objectives           | 3        | State specific objectives, including any prespecified hypotheses                                                                                                                           | 4-5                  |
| <b>Methods</b>       |          |                                                                                                                                                                                            |                      |
| Study Design         | 4        | Present key elements of study design early in the paper                                                                                                                                    | 5                    |
| Setting              | 5        | Describe the setting, locations, and relevant dates, including periods of recruitment, exposure, follow-up, and data collection                                                            | 5                    |
| Participants         | 6        | (a) <i>Cohort study</i> —Give the eligibility criteria, and the sources and methods of selection of participants. Describe methods of follow-up                                            | 5                    |
|                      |          | <i>Case-control study</i> —Give the eligibility criteria, and the sources and methods of case ascertainment and control selection. Give the rationale for the choice of cases and controls | N/A                  |
|                      |          | <i>Cross-sectional study</i> —Give the eligibility criteria, and the sources and methods of selection of participants                                                                      | N/A                  |
|                      |          | (b) <i>Cohort study</i> —For matched studies, give matching criteria and number of exposed and unexposed                                                                                   | N/A                  |
|                      |          | <i>Case-control study</i> —For matched studies, give matching criteria and the number of controls per case                                                                                 | N/A                  |
| Variables            | 7        | Clearly define all outcomes, exposures, predictors, potential confounders, and effect modifiers. Give diagnostic criteria, if applicable                                                   | 6                    |

| Section and Item             | Item No. | Recommendation                                                                                                                                                                                    | Reported on Page No. |
|------------------------------|----------|---------------------------------------------------------------------------------------------------------------------------------------------------------------------------------------------------|----------------------|
| Data Sources/<br>Measurement | 8*       | For each variable of interest, give sources of data and details of methods of assessment (measurement). Describe comparability of assessment methods if there is more than one group              | 6                    |
| Bias                         | 9        | Describe any efforts to address potential sources of bias                                                                                                                                         | 6-7                  |
| Study Size                   | 10       | Explain how the study size was arrived at                                                                                                                                                         | 6                    |
| Quantitative Variables       | 11       | Explain how quantitative variables were handled in the analyses. If applicable, describe which groupings were chosen and why                                                                      | 7                    |
| Statistical Methods          | 12       | (a) Describe all statistical methods, including those used to control for confounding                                                                                                             | 7                    |
|                              |          | (b) Describe any methods used to examine subgroups and interactions                                                                                                                               | 7                    |
|                              |          | (c) Explain how missing data were addressed                                                                                                                                                       | 7                    |
|                              |          | (d) <i>Cohort study</i> —If applicable, explain how loss to follow-up was addressed<br><i>Case-control study</i> —If applicable, explain how matching of cases and controls was addressed         | N/A                  |
|                              |          | (e) Describe any sensitivity analyses                                                                                                                                                             | N/A                  |
| <b>Results</b>               |          |                                                                                                                                                                                                   |                      |
| Participants                 | 13*      | (a) Report numbers of individuals at each stage of study—eg numbers potentially eligible, examined for eligibility, confirmed eligible, included in the study, completing follow-up, and analysed | 8                    |
|                              |          | (b) Give reasons for non-participation at each stage                                                                                                                                              | 8                    |
|                              |          | (c) Consider use of a flow diagram                                                                                                                                                                | N/A                  |
| Descriptive Data             | 14*      | (a) Give characteristics of study participants (eg demographic, clinical, social) and information on exposures and potential confounders                                                          | 8                    |
|                              |          | (b) Indicate number of participants with missing data for each variable of interest                                                                                                               | 8                    |
|                              |          | (c) <i>Cohort study</i> —Summarise follow-up time (eg, average and total amount)                                                                                                                  |                      |
| Outcome Data                 | 15*      | <i>Cohort study</i> —Report numbers of outcome events or summary measures over time                                                                                                               | 8                    |
|                              |          | <i>Case-control study</i> —Report numbers in each exposure category, or summary measures of exposure                                                                                              | N/A                  |
|                              |          | <i>Cross-sectional study</i> —Report numbers of outcome events or summary measures                                                                                                                | N/A                  |



| Section and Item         | Item No. | Recommendation                                                                                                                                                                                               | Reported on Page No. |
|--------------------------|----------|--------------------------------------------------------------------------------------------------------------------------------------------------------------------------------------------------------------|----------------------|
| Main Results             | 16       | (a) Give unadjusted estimates and, if applicable, confounder-adjusted estimates and their precision (eg, 95% confidence interval). Make clear which confounders were adjusted for and why they were included | 8-9                  |
|                          |          | (b) Report category boundaries when continuous variables were categorized                                                                                                                                    | N/A                  |
|                          |          | (c) If relevant, consider translating estimates of relative risk into absolute risk for a meaningful time period                                                                                             | N/A                  |
| Other Analyses           | 17       | Report other analyses done—eg analyses of subgroups and interactions, and sensitivity analyses                                                                                                               | 9                    |
| <b>Discussion</b>        |          |                                                                                                                                                                                                              |                      |
| Key Results              | 18       | Summarise key results with reference to study objectives                                                                                                                                                     | 9                    |
| Limitations              | 19       | Discuss limitations of the study, taking into account sources of potential bias or imprecision. Discuss both direction and magnitude of any potential bias                                                   | 12                   |
| Interpretation           | 20       | Give a cautious overall interpretation of results considering objectives, limitations, multiplicity of analyses, results from similar studies, and other relevant evidence                                   | 11                   |
| Generalisability         | 21       | Discuss the generalisability (external validity) of the study results                                                                                                                                        | 12                   |
| <b>Other Information</b> |          |                                                                                                                                                                                                              |                      |
| Funding                  | 22       | Give the source of funding and the role of the funders for the present study and, if applicable, for the original study on which the present article is based                                                | 13                   |

\*Give information separately for cases and controls in case-control studies and, if applicable, for exposed and unexposed groups in cohort and cross-sectional studies.

**Once you have completed this checklist, please save a copy and upload it as part of your submission. DO NOT include this checklist as part of the main manuscript document. It must be uploaded as a separate file.**
