# Supplementary material for: Consequences of early life exposure to the 1983–1985 Ethiopian Great Famine on cognitive function in adults: a historical cohort study
Source: PubMed Central journal article supplement — BMJ Open. 2020 Sep 24;10(9):e038977. doi: 10.1136/bmjopen-2020-038977 (PMC7517579; doi:10.1136/bmjopen-2020-038977), 2020-09-24
Supplement: bmjopen-2020-038977supp001.pdf [file bmjopen-2020-038977supp001.pdf]

Window of exposure to the 1983-1985 Ethiopian Great Famine cohorts, North Wollo Zone, 2019.

| <b>Date of birth<br/>(dd/mm/yyyy)</b>                                   | <b>Exposure to the<br/>famine (August<br/>1983, August<br/>1985)</b> | <b>Age during the famine</b>                | <b>Age in<br/>2019<br/>(Current<br/>age)</b> |
|-------------------------------------------------------------------------|----------------------------------------------------------------------|---------------------------------------------|----------------------------------------------|
| <b>During famine</b><br>08/August/1983-<br>30/August /1985<br>(n=348)   | Prenatal exposed                                                     | Famine exposure during the<br>famine period | 34-36                                        |
| <b>Post-famine</b><br>08/September/1986-<br>30/August/1987              | Transition<br>(Washout period)                                       | One years after the famine                  | 33                                           |
| <b>Pre-famine</b><br>08/September/1981-<br>08/August/1983<br>(n=349)    | Postnatal exposed                                                    | Birth-two years during the<br>famine        | 37-38                                        |
| <b>Post-famine</b><br>08/September/1987-<br>08/October/1988<br>(n= 350) | Non- exposed<br>(reference group)                                    | Two years after the famine                  | 30-32                                        |
| <b>Total sample size</b>                                                |                                                                      | 1047                                        |                                              |

*Dd: days, mm: months, yy: years*
